# Supplementary material
Source: PubMed Central journal article supplement (PMC3684048)
Supplement: NIHMS414569-supplement-1.pdf [file NIHMS414569-supplement-1.pdf]

**Abnormal development of NG2<sup>+</sup> PDGFR $\alpha$ <sup>+</sup> neural progenitor cells leads to neonatal hydrocephalus in a ciliopathy mouse model.**

**Authors:** Calvin S. Carter<sup>1,\*</sup>, Timothy W. Vogel<sup>2,\*</sup>, Qihong Zhang<sup>3,9</sup>, Seongjin Seo<sup>4,9</sup>, Ruth E. Swiderski<sup>3,9</sup>, Thomas O. Moninger<sup>8</sup>, Martin D. Cassell<sup>5</sup>, Daniel R. Thedens<sup>6</sup>, Kim M. Keppler-Noreuil<sup>3</sup>, Peggy Nopoulos<sup>7</sup>, Darryl Y. Nishimura<sup>3</sup>, Charles C. Searby<sup>3,9</sup>, Kevin Bugge<sup>3,9</sup>, Val C. Sheffield<sup>3,9</sup>.

<sup>1</sup>Graduate Program in Neuroscience, Departments of <sup>2</sup>Neurosurgery, <sup>3</sup>Pediatrics, Division of Medical Genetics, <sup>4</sup>Ophthalmology, <sup>5</sup>Anatomy and Cell Biology, <sup>6</sup>Radiology, <sup>7</sup>Psychiatry, <sup>8</sup>Central Microscopy Research Facilities and the <sup>9</sup>Howard Hughes Medical Institute, University of Iowa Carver College of Medicine, Iowa, IA 52242, USA.

\*Equal author contribution.

**Corresponding author and reprint requests:** Val C. Sheffield, M.D., PhD., Howard Hughes Medical Institute, University of Iowa Carver College of Medicine, Iowa City, Iowa, 52242. Telephone # (319)-355-7311 Fax # (319)-353-6605

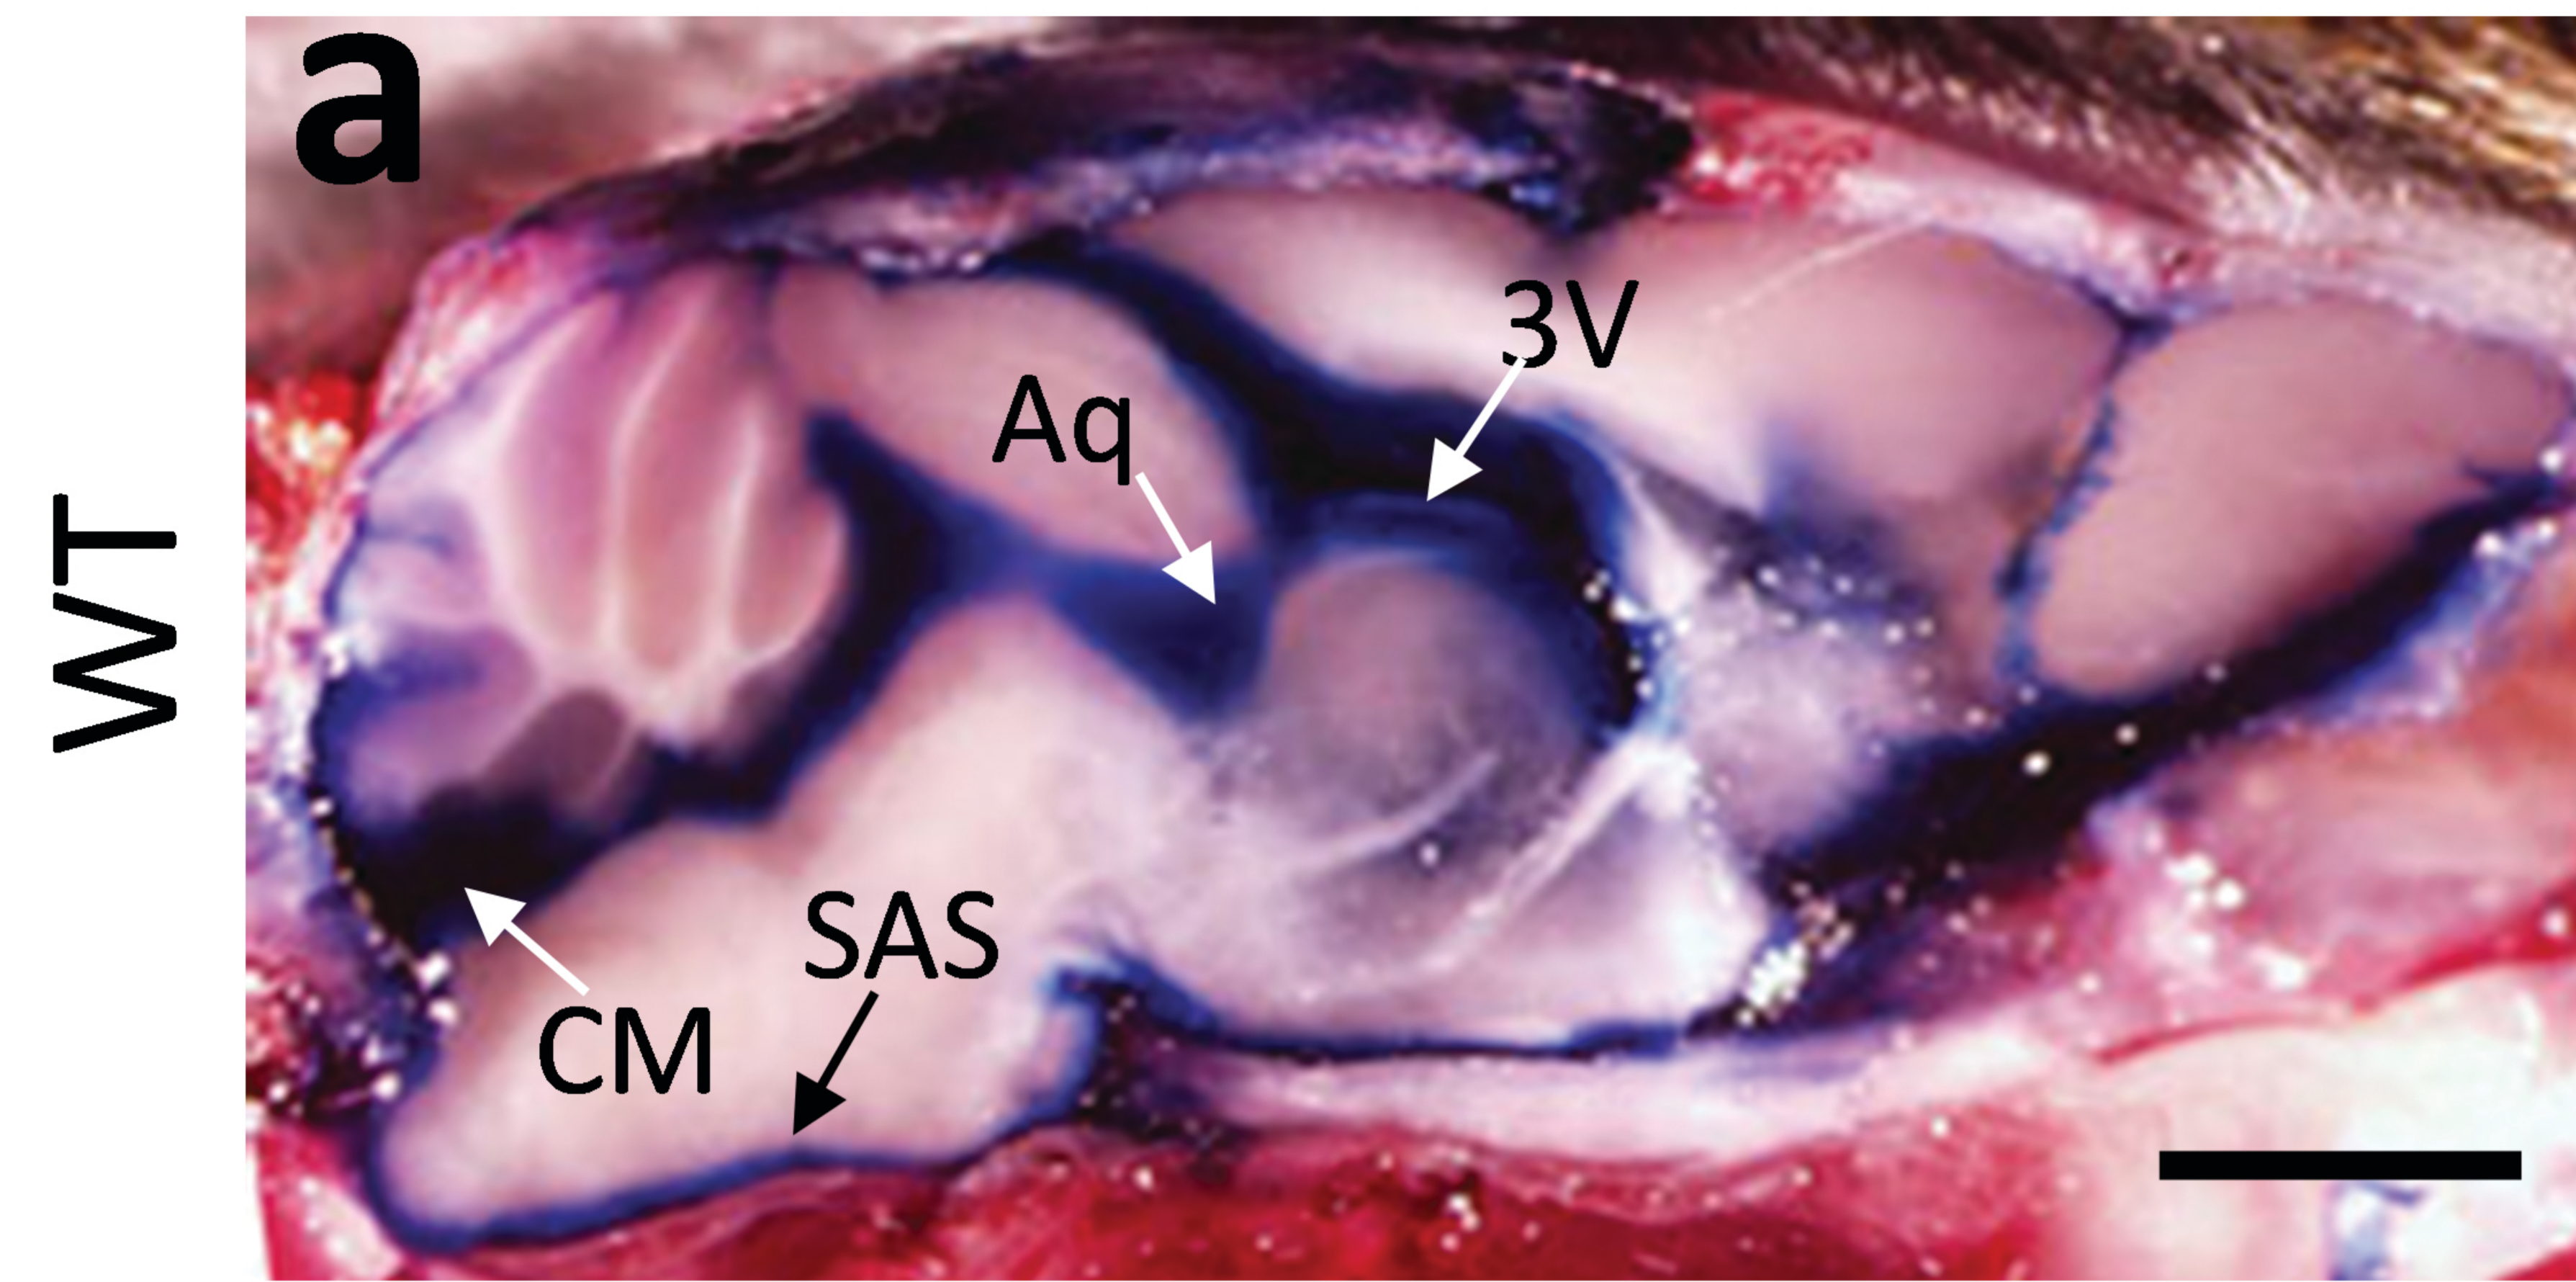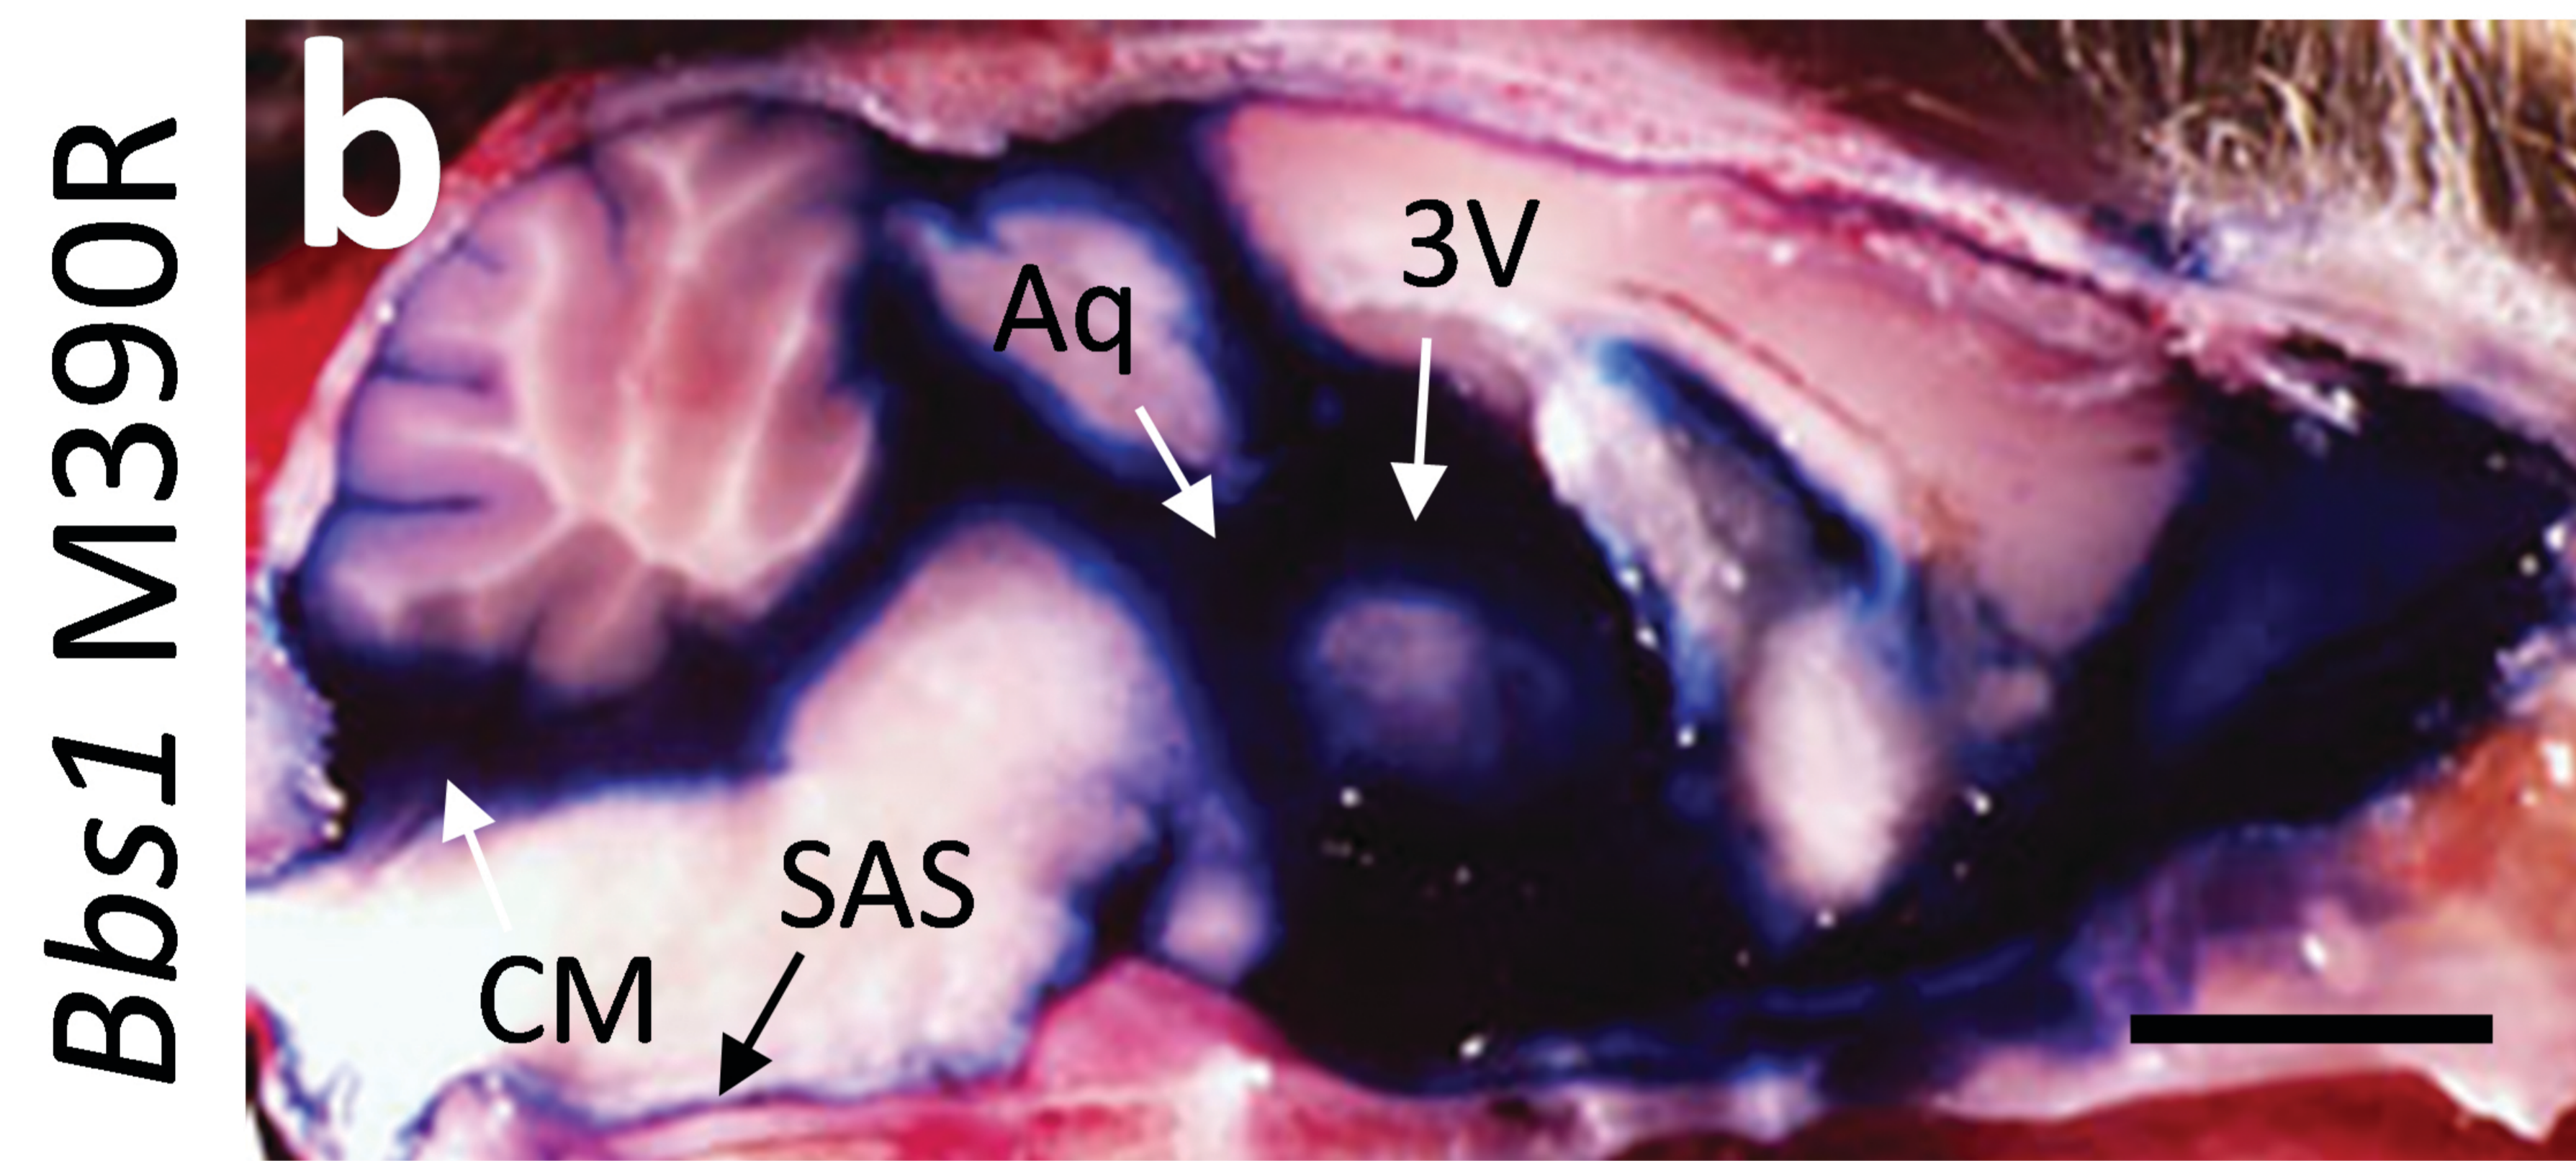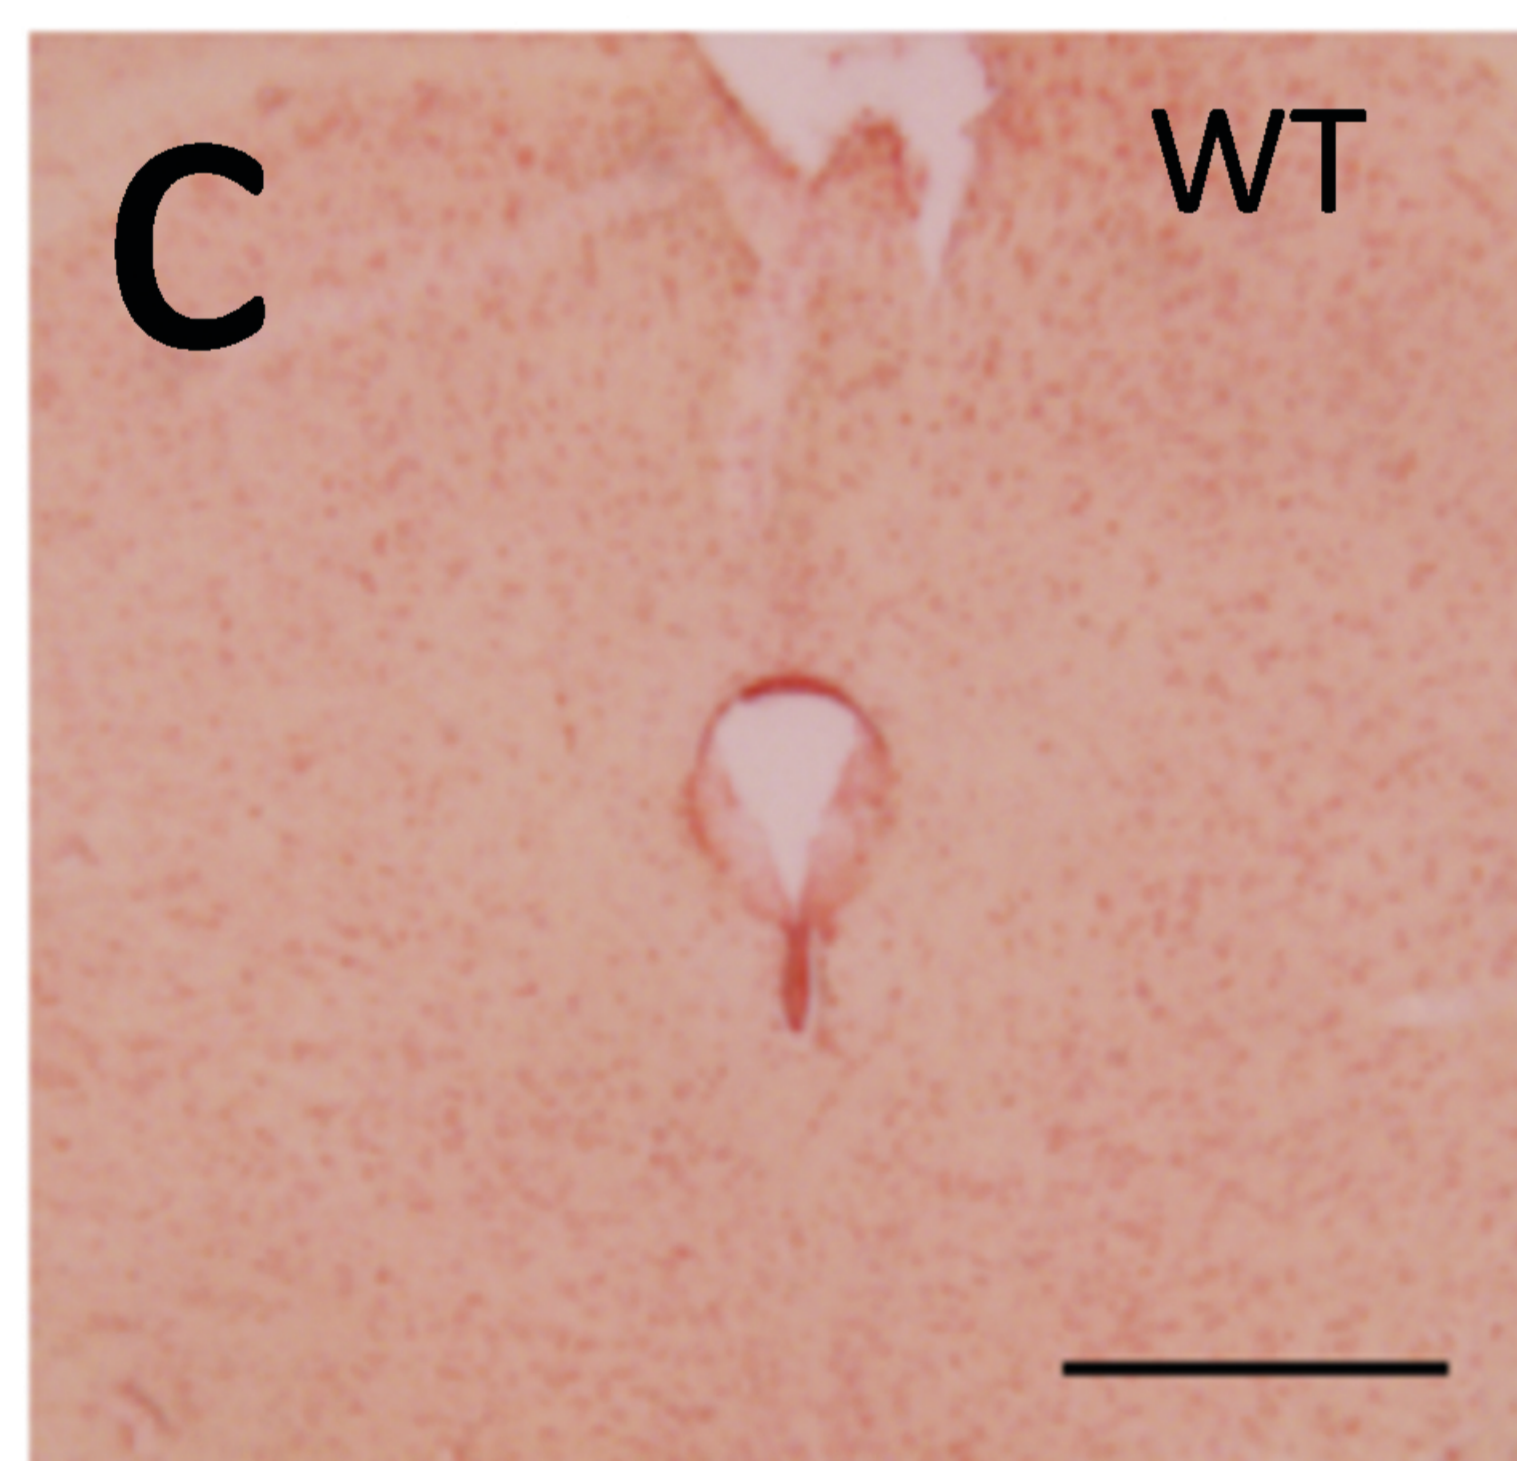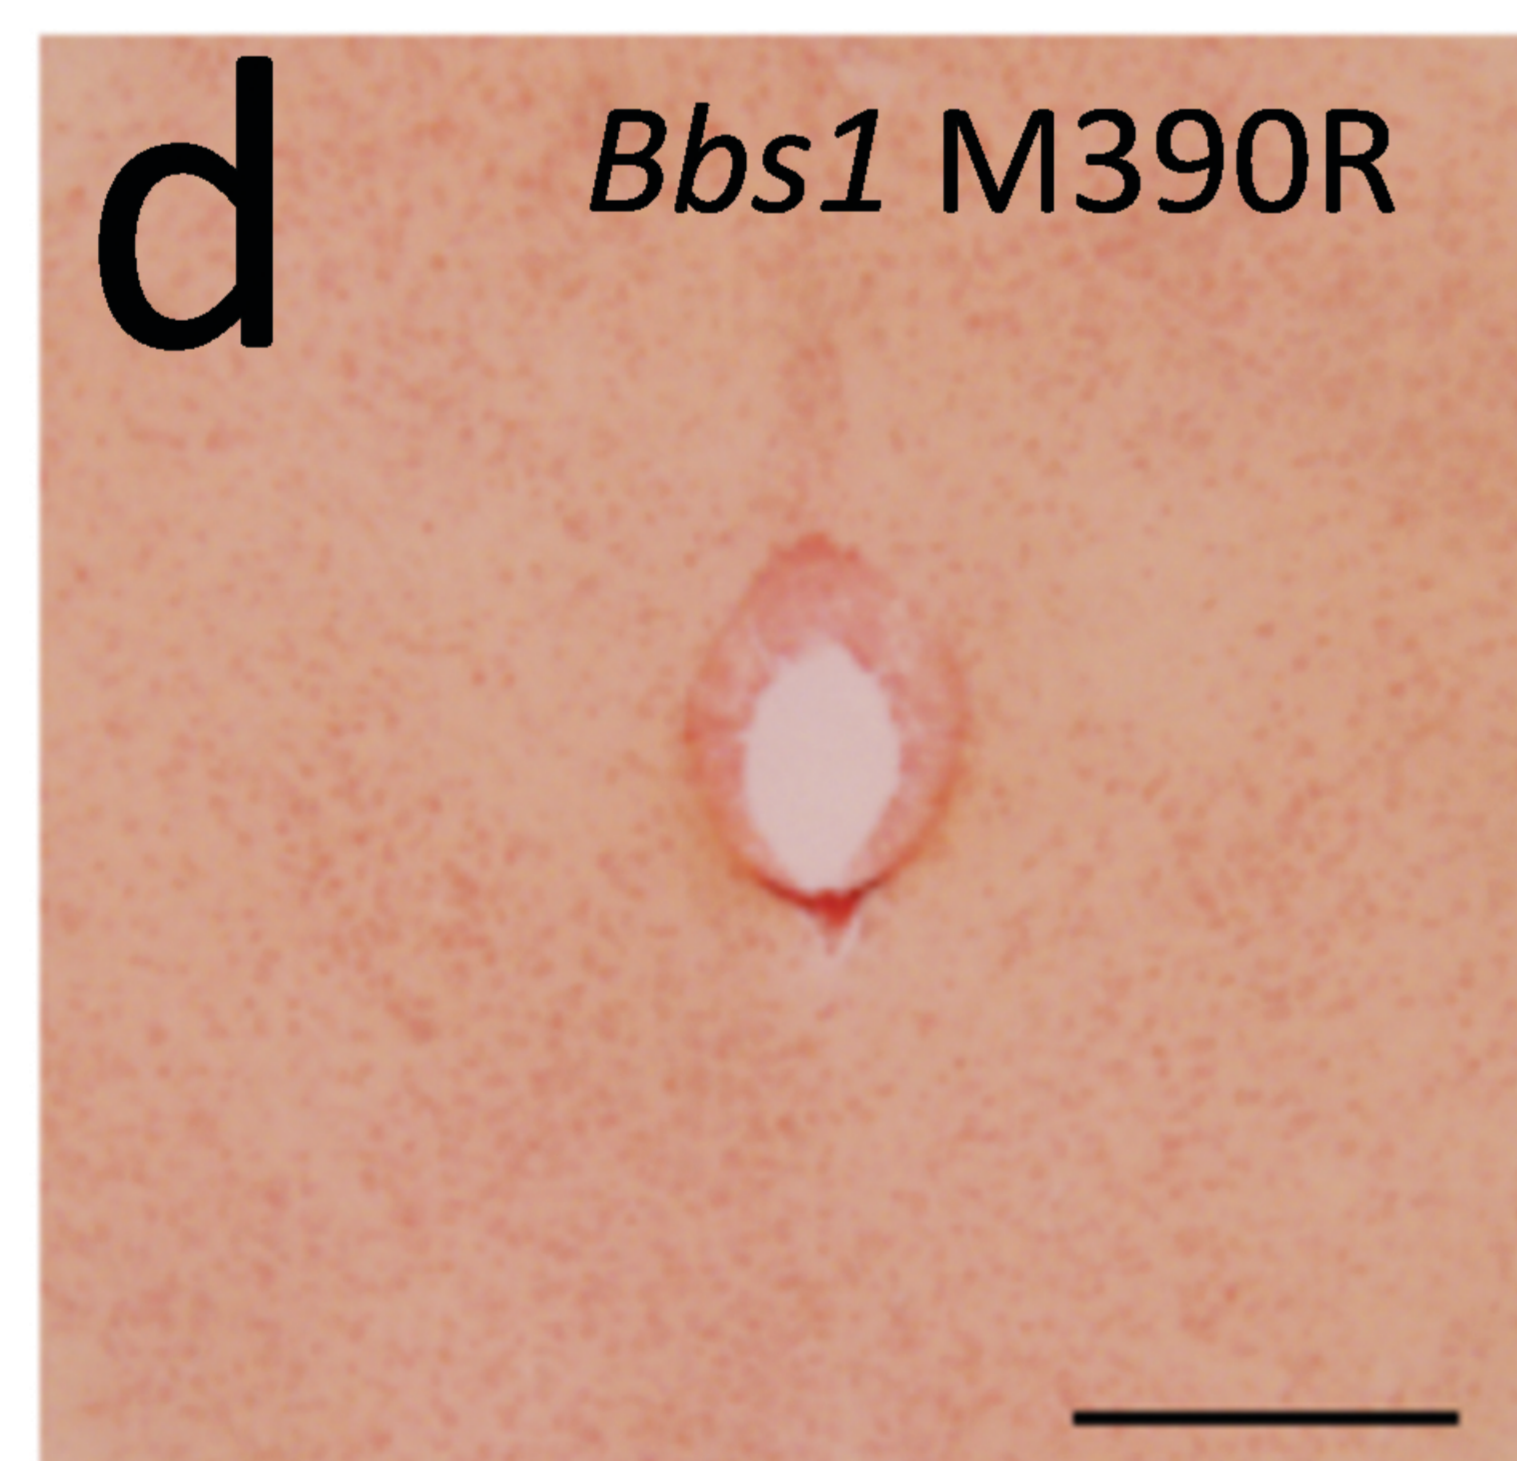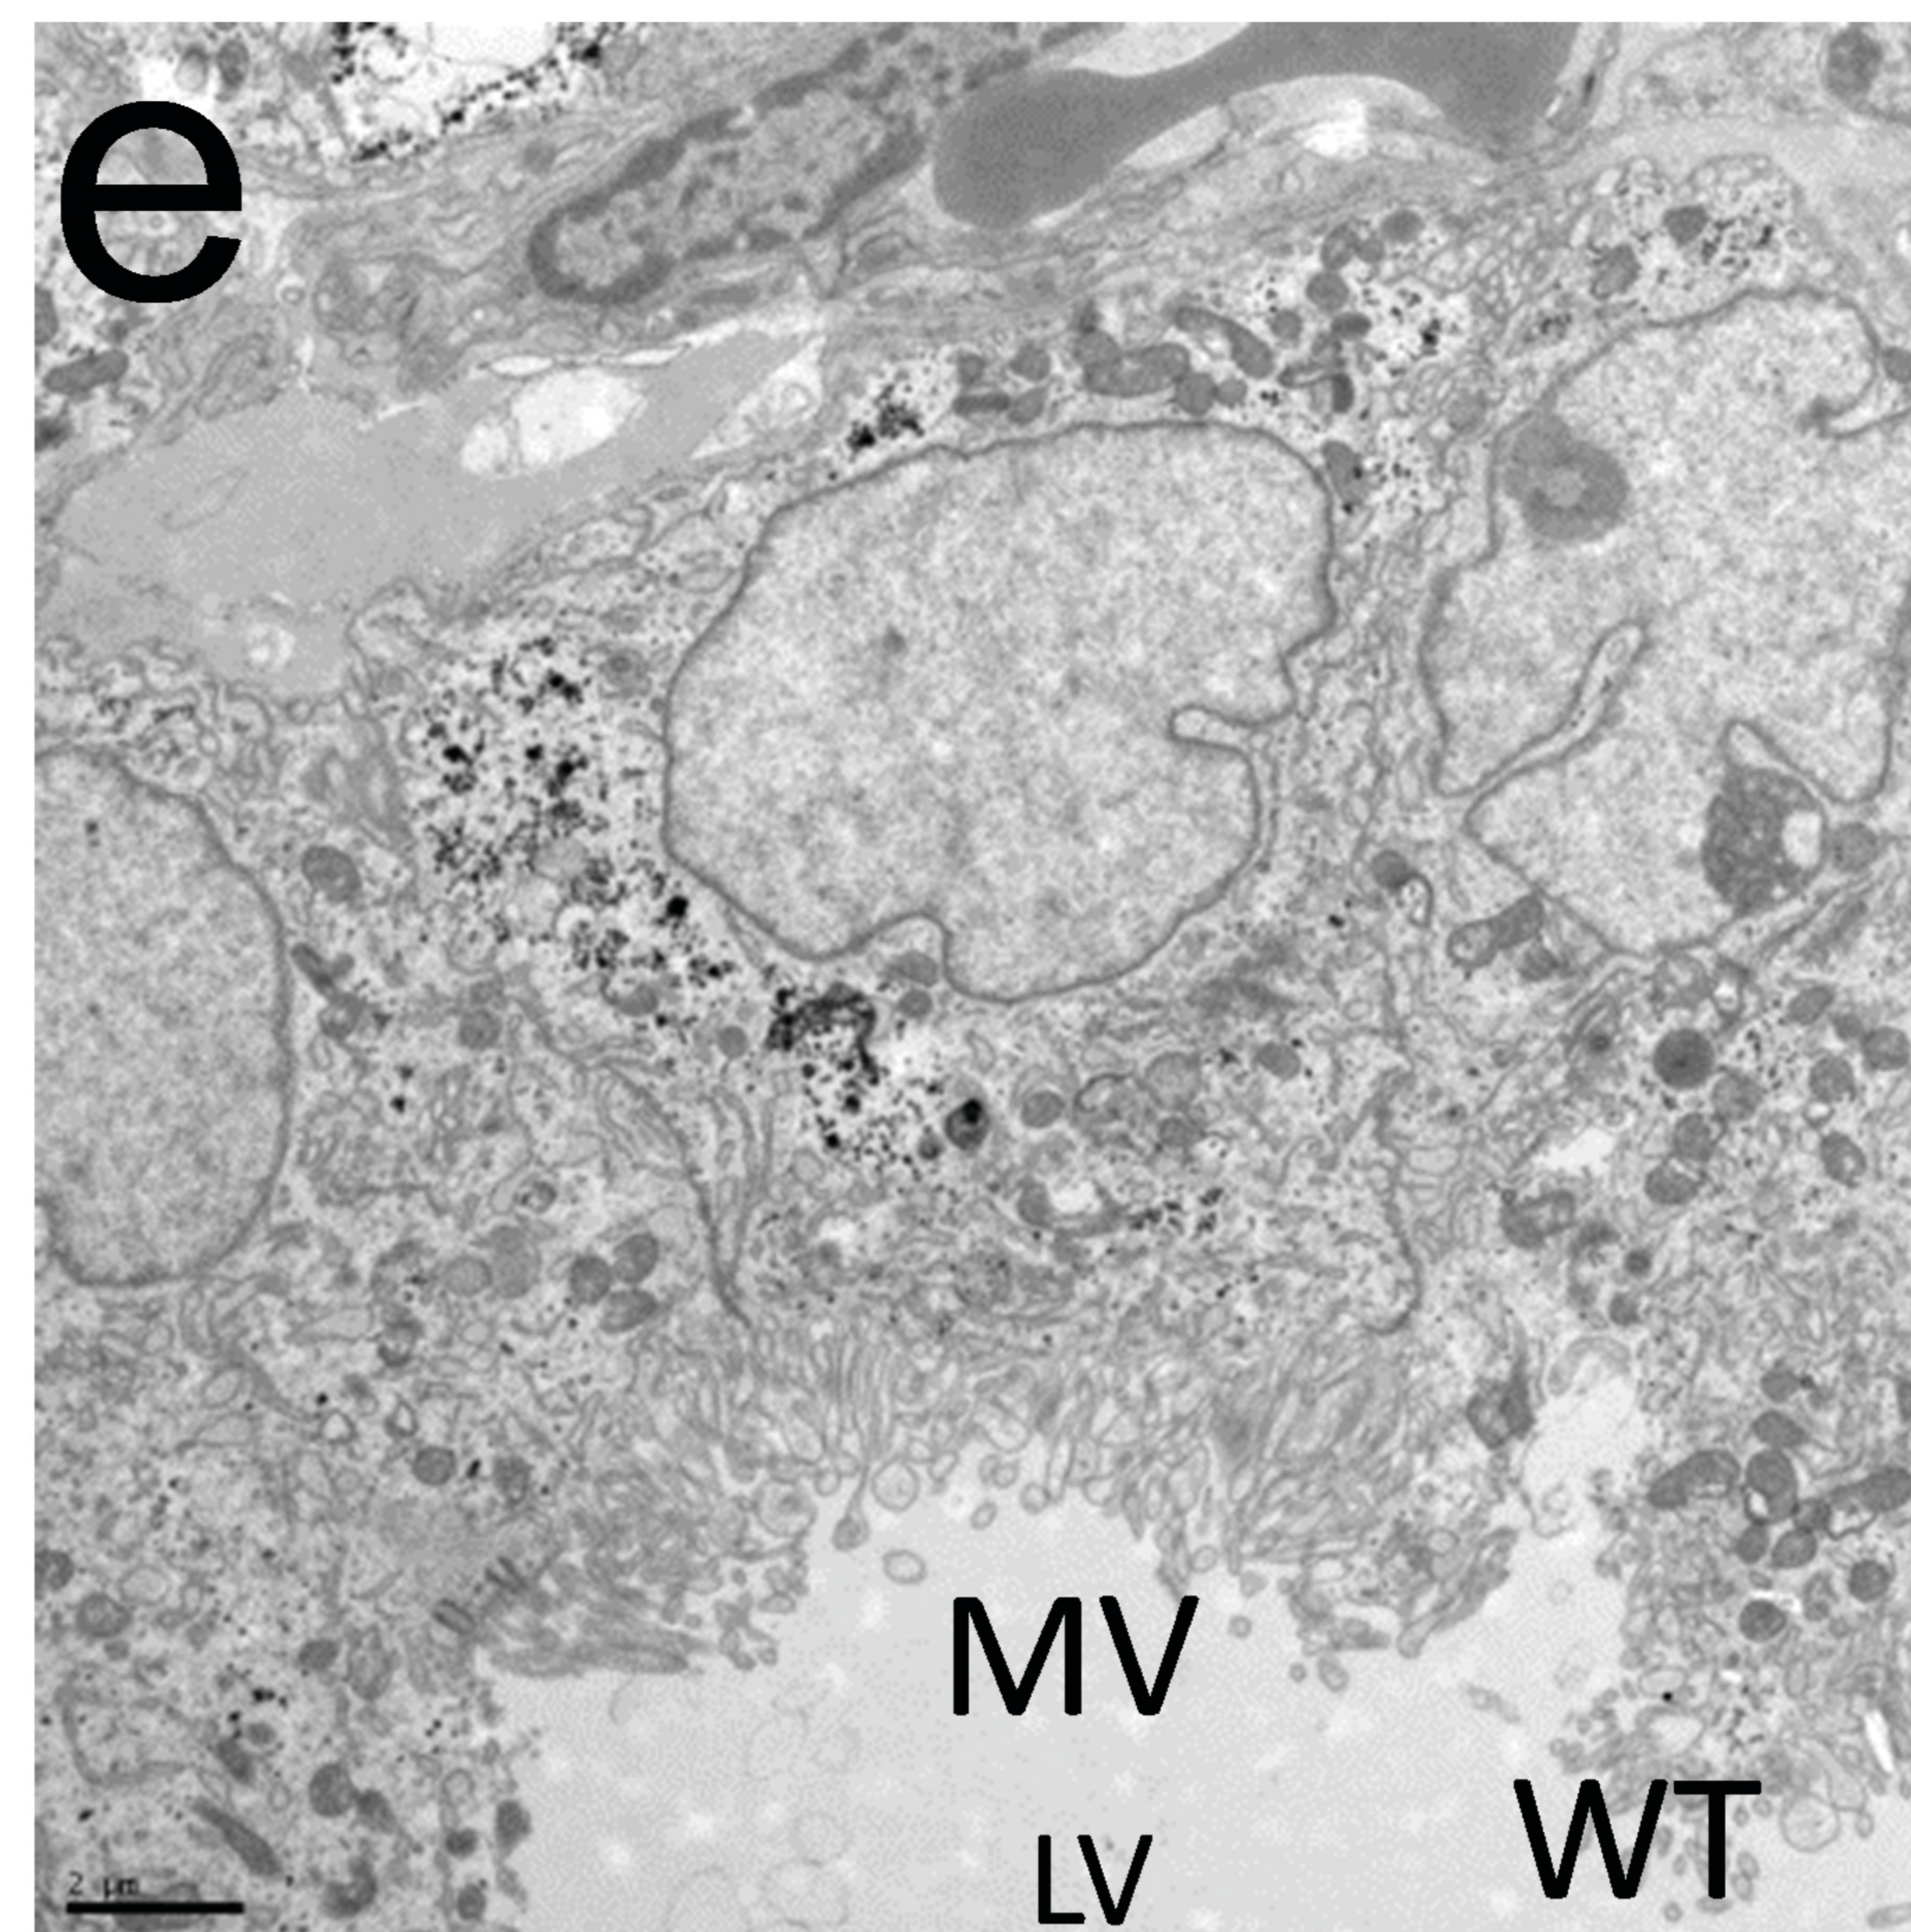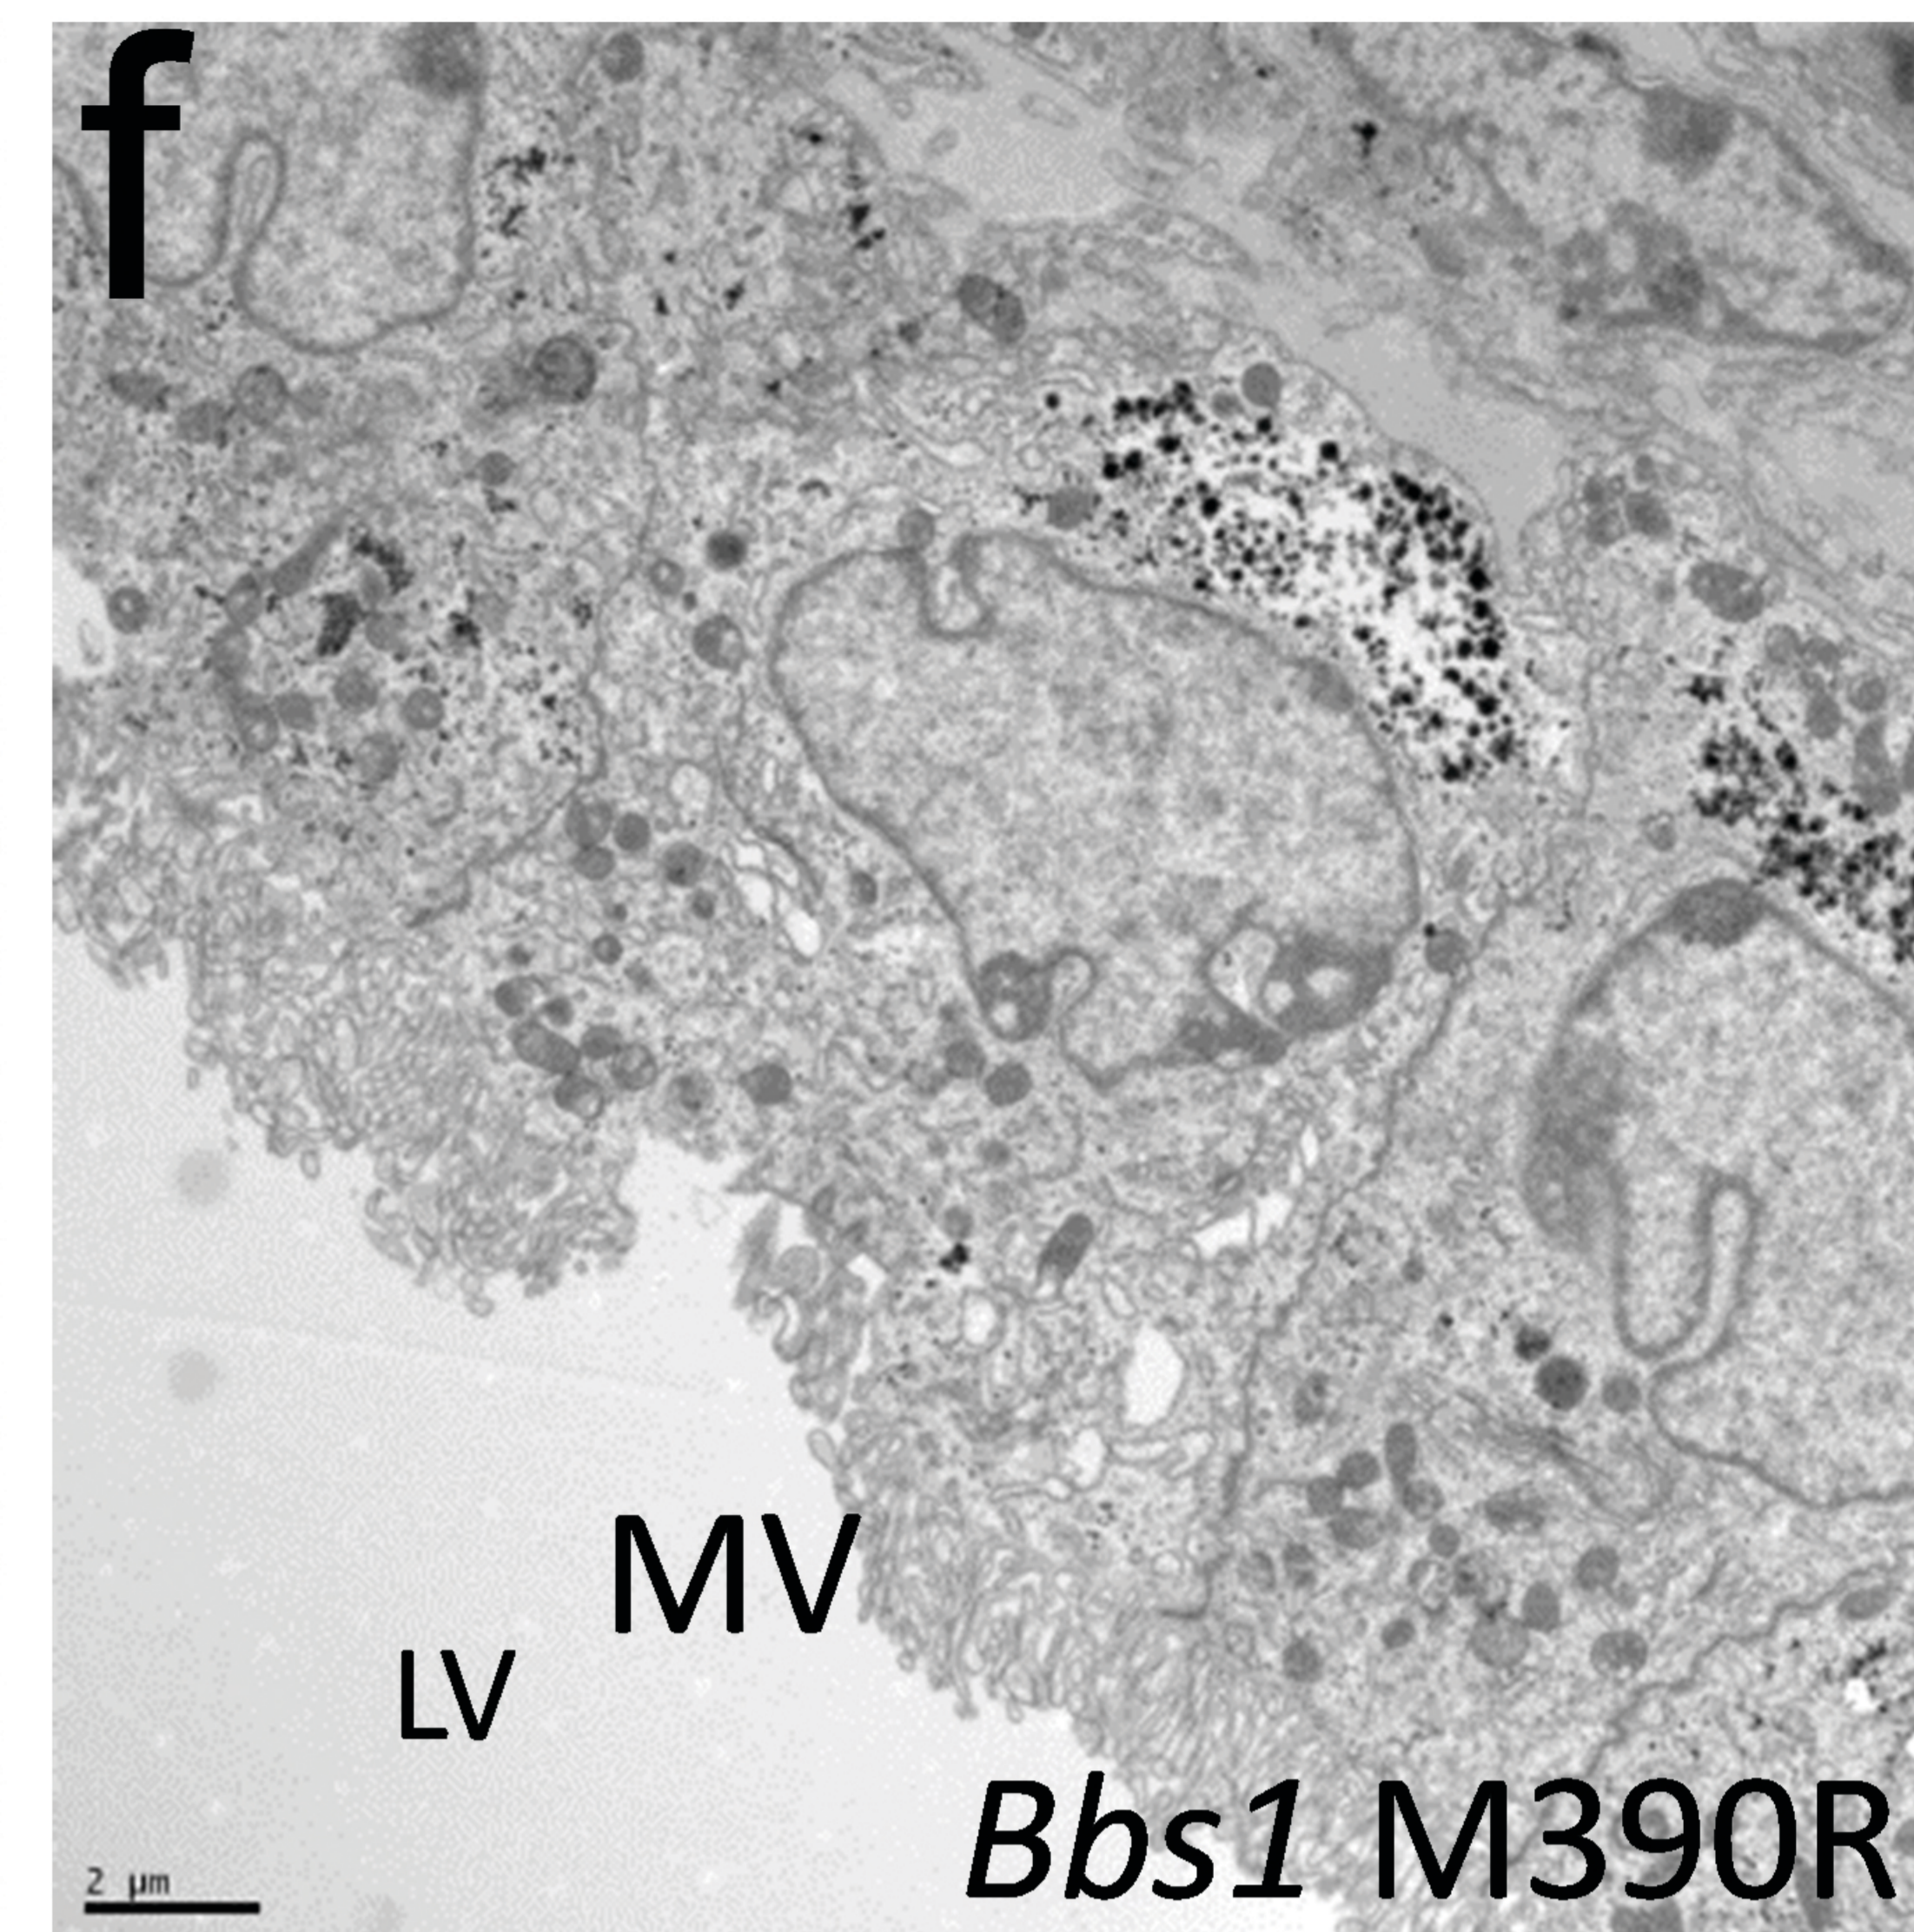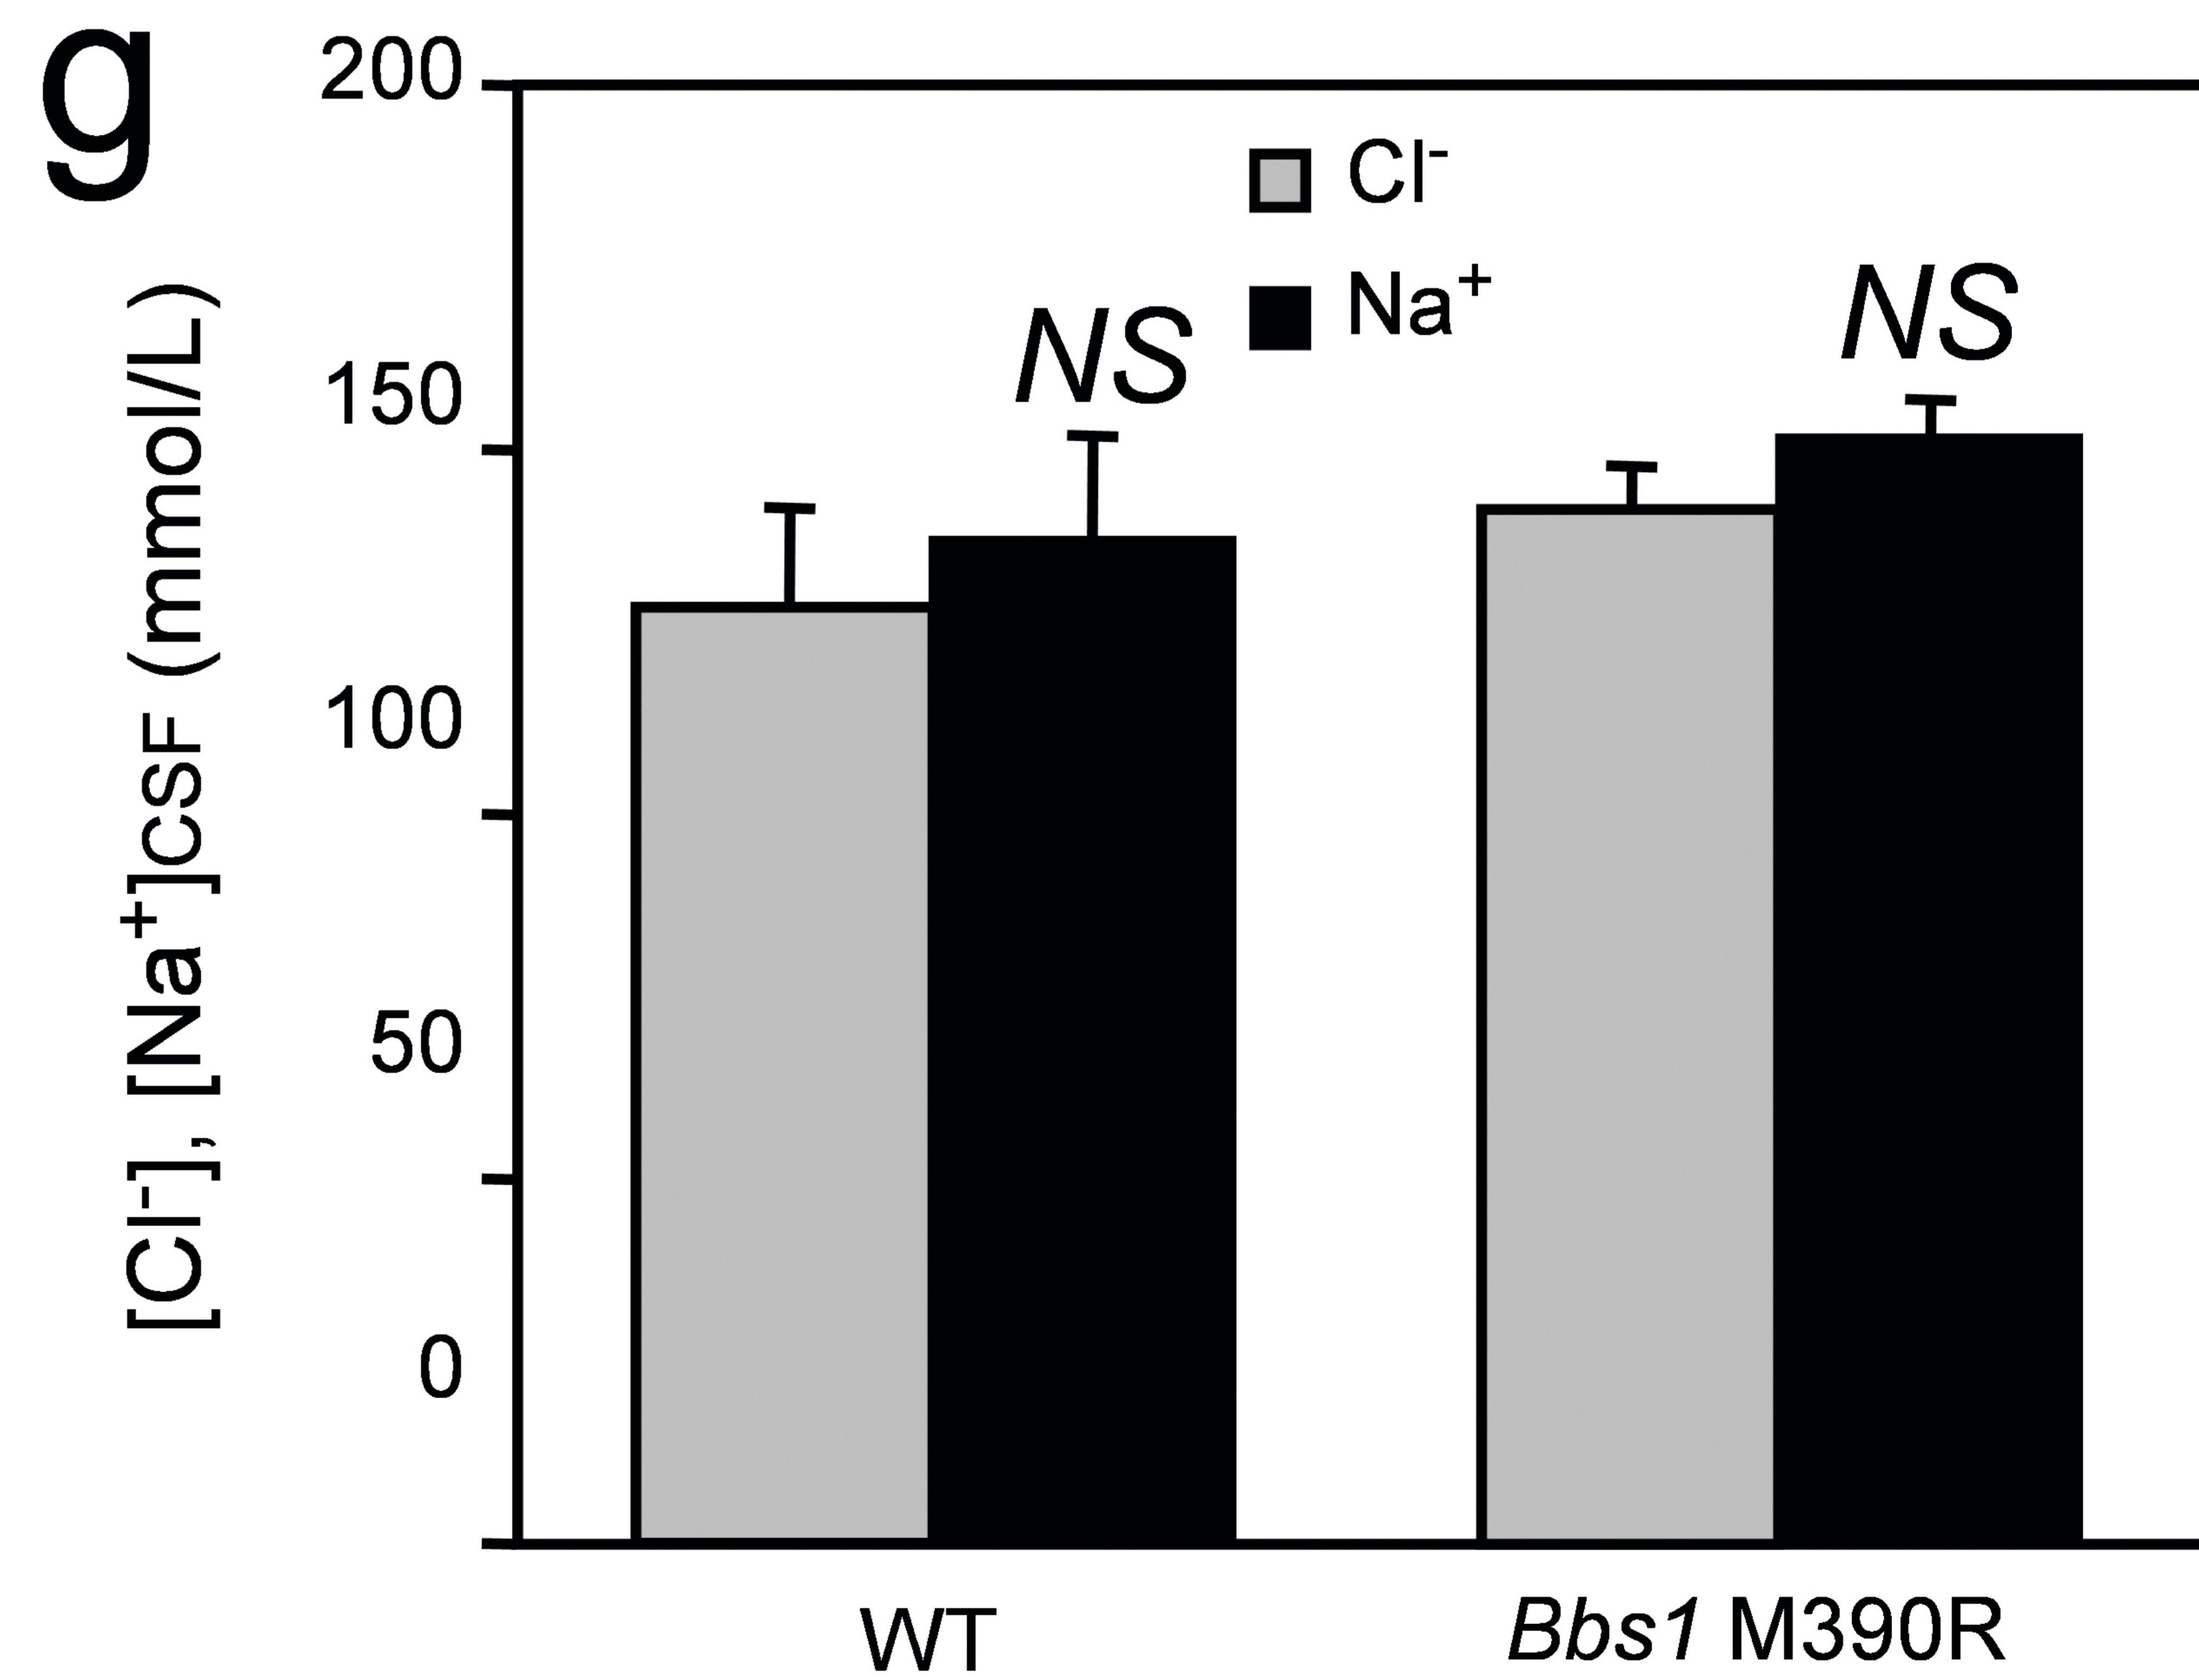

Supplementary Figure 1

**Supplementary Figure 1** Hydrocephalus in *Bbs1*<sup>M390R/M390R</sup> mice is communicating. Sagittal view of adult WT (**a**) and *Bbs1*<sup>M390R/M390R</sup> (**b**) mice injected with Evan's Blue dye, showing normal CSF circulation. (**c,d**) Histology showing patent cerebral aqueduct in WT (**c**) and *Bbs1*<sup>M390R/M390R</sup> (**d**) brains. (**e,f**) TEM micrographs of P0 brains showing normal ultrastructure of the choroid plexus epithelium in both WT (**e**) and *Bbs1*<sup>M390R/M390R</sup> (**f**) mice. *Bbs1*<sup>M390R/M390R</sup> cells appear healthy with microvilli protruding from the apical surface into the lateral ventricle. (**g**) Quantitations of CSF concentrations of Cl<sup>-</sup> and Na<sup>+</sup> showing normal ion concentrations in *Bbs1*<sup>M390R/M390R</sup> mice ([Na<sup>+</sup>] *P*=0.35, [Cl<sup>-</sup>] *P*=0.10). *n*= at least 3 mice per group and genotype for all experiments. All error bars represent s.e.m and statistical results derive from unpaired *t* tests. Scale bars equal 2 mm (**a,b**), 1 mm (**c,d**) and 2 μm (**e,f**). 3V, third ventricle; Aq, cerebral aqueduct; CM, cisterna magna; LV, lateral ventricle; MV, microvilli; SAS, subarachnoid space.

**a**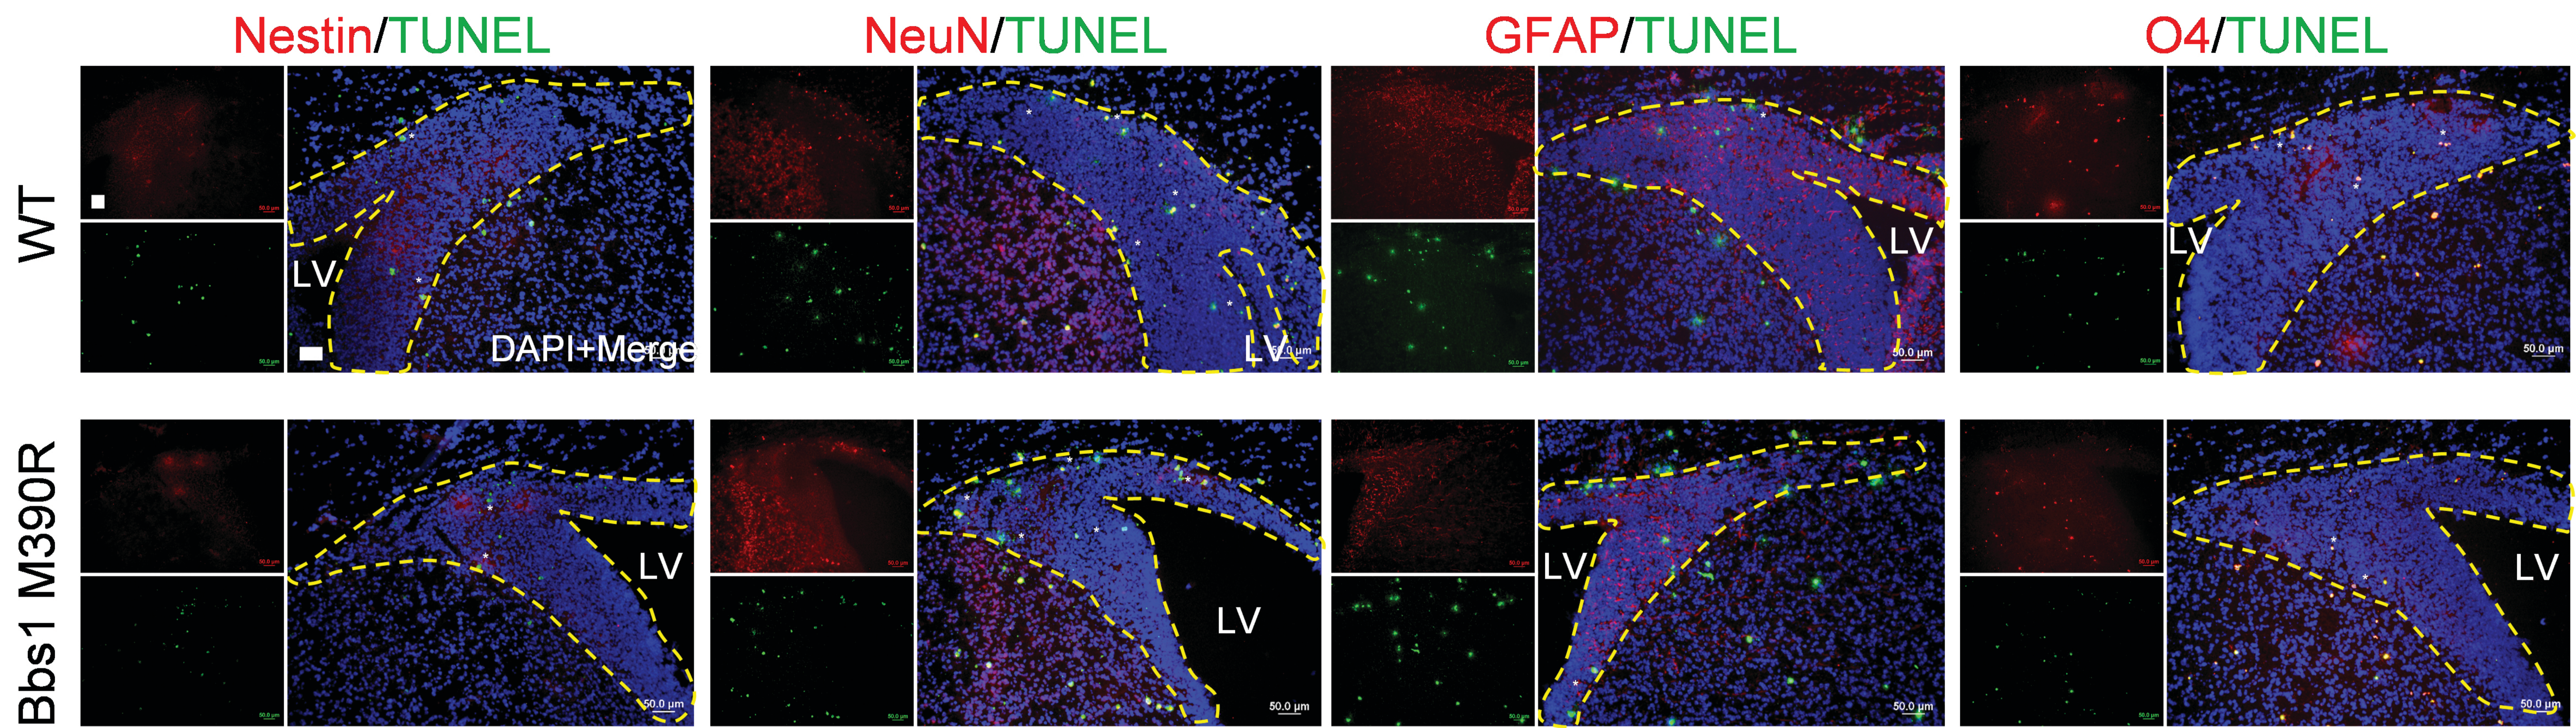**b**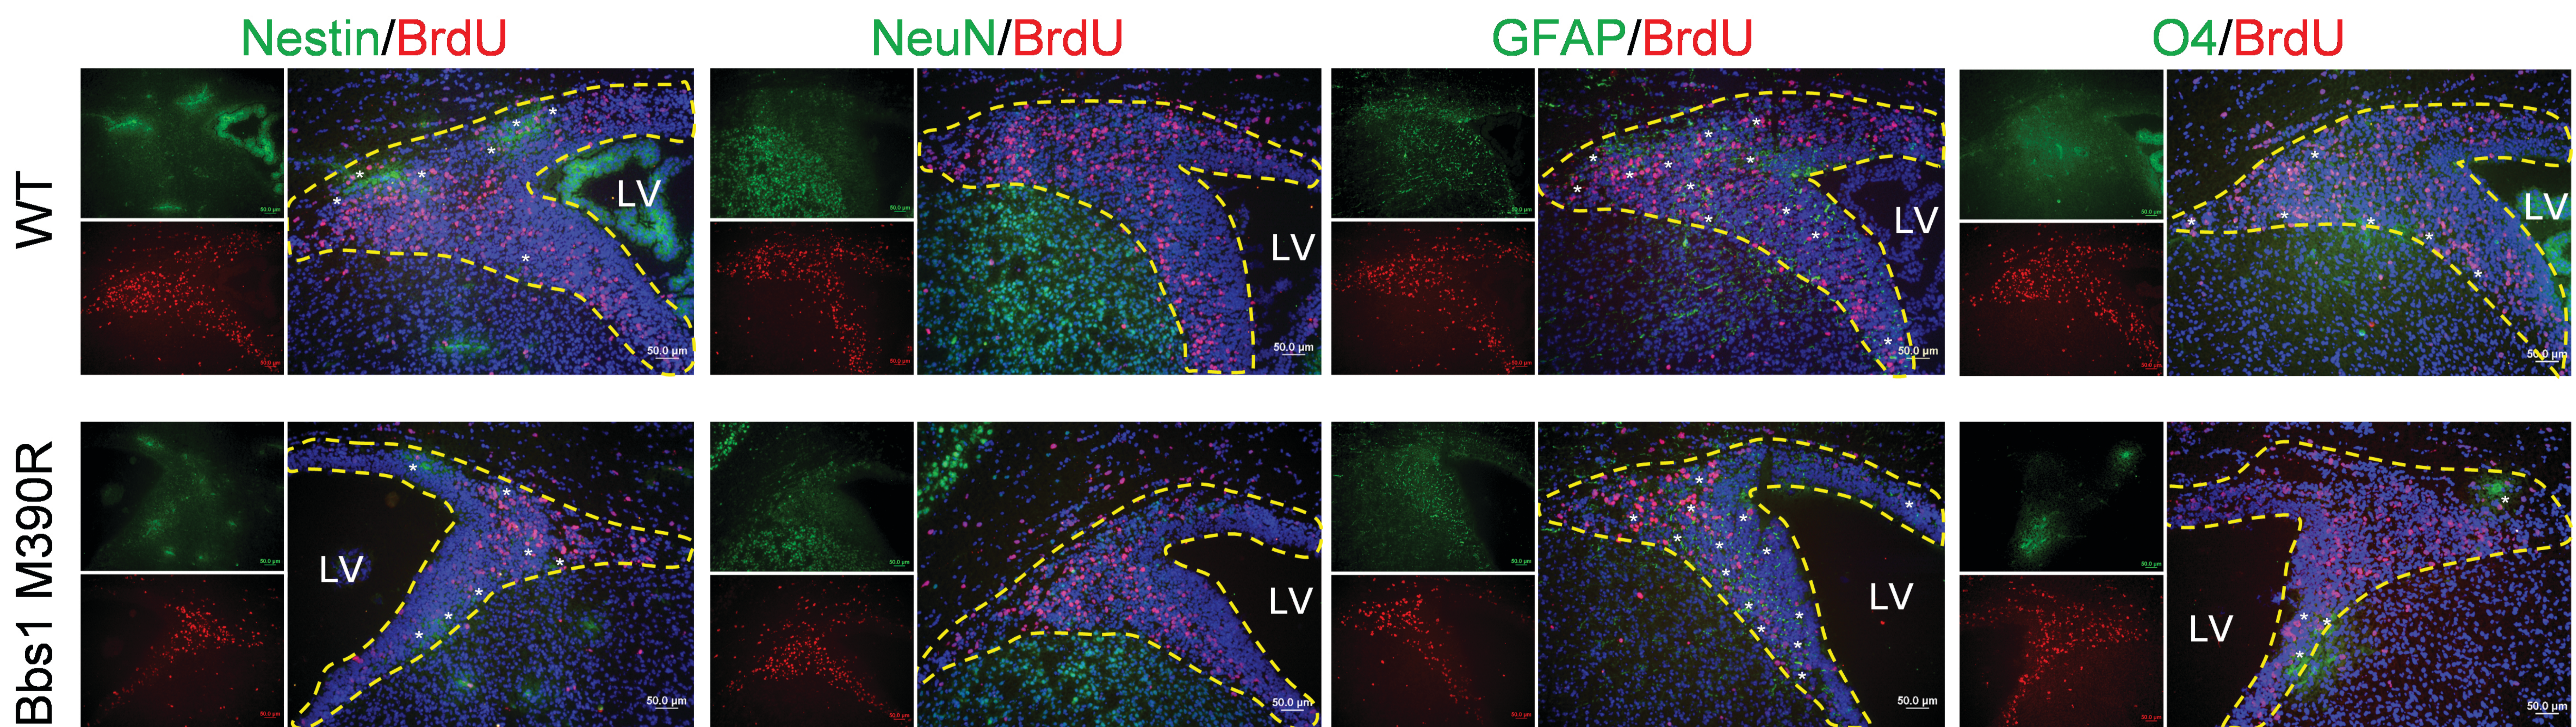

Supplementary Figure 2

**Supplementary Figure 2** Normal apoptosis and cell proliferation of Nestin, NeuN, GFAP and O4 positive cells in the SVZ of BBS mutant mice. **(a,b)** Representative immunofluorescent images showing the SVZ in brain tissue from post-natal day 3 pups labeled with TUNEL **(a, green)** or BrdU **(b, red)** and Nestin, NeuN, GFAP and O4. No significant differences were found between WT and  $Bbs1^{M390R/M390R}$  **(Fig. 3)**. BrdU<sup>+</sup> cells also expressing NeuN were not analyzed because post-mitotic neurons (NeuN<sup>+</sup>) do not divide and no significant overlap was observed. We analyzed at least 3 mice per group and genotype. Scale bars equal 50  $\mu\text{m}$ . LV, lateral ventricle; SVZ, subventricular zone.

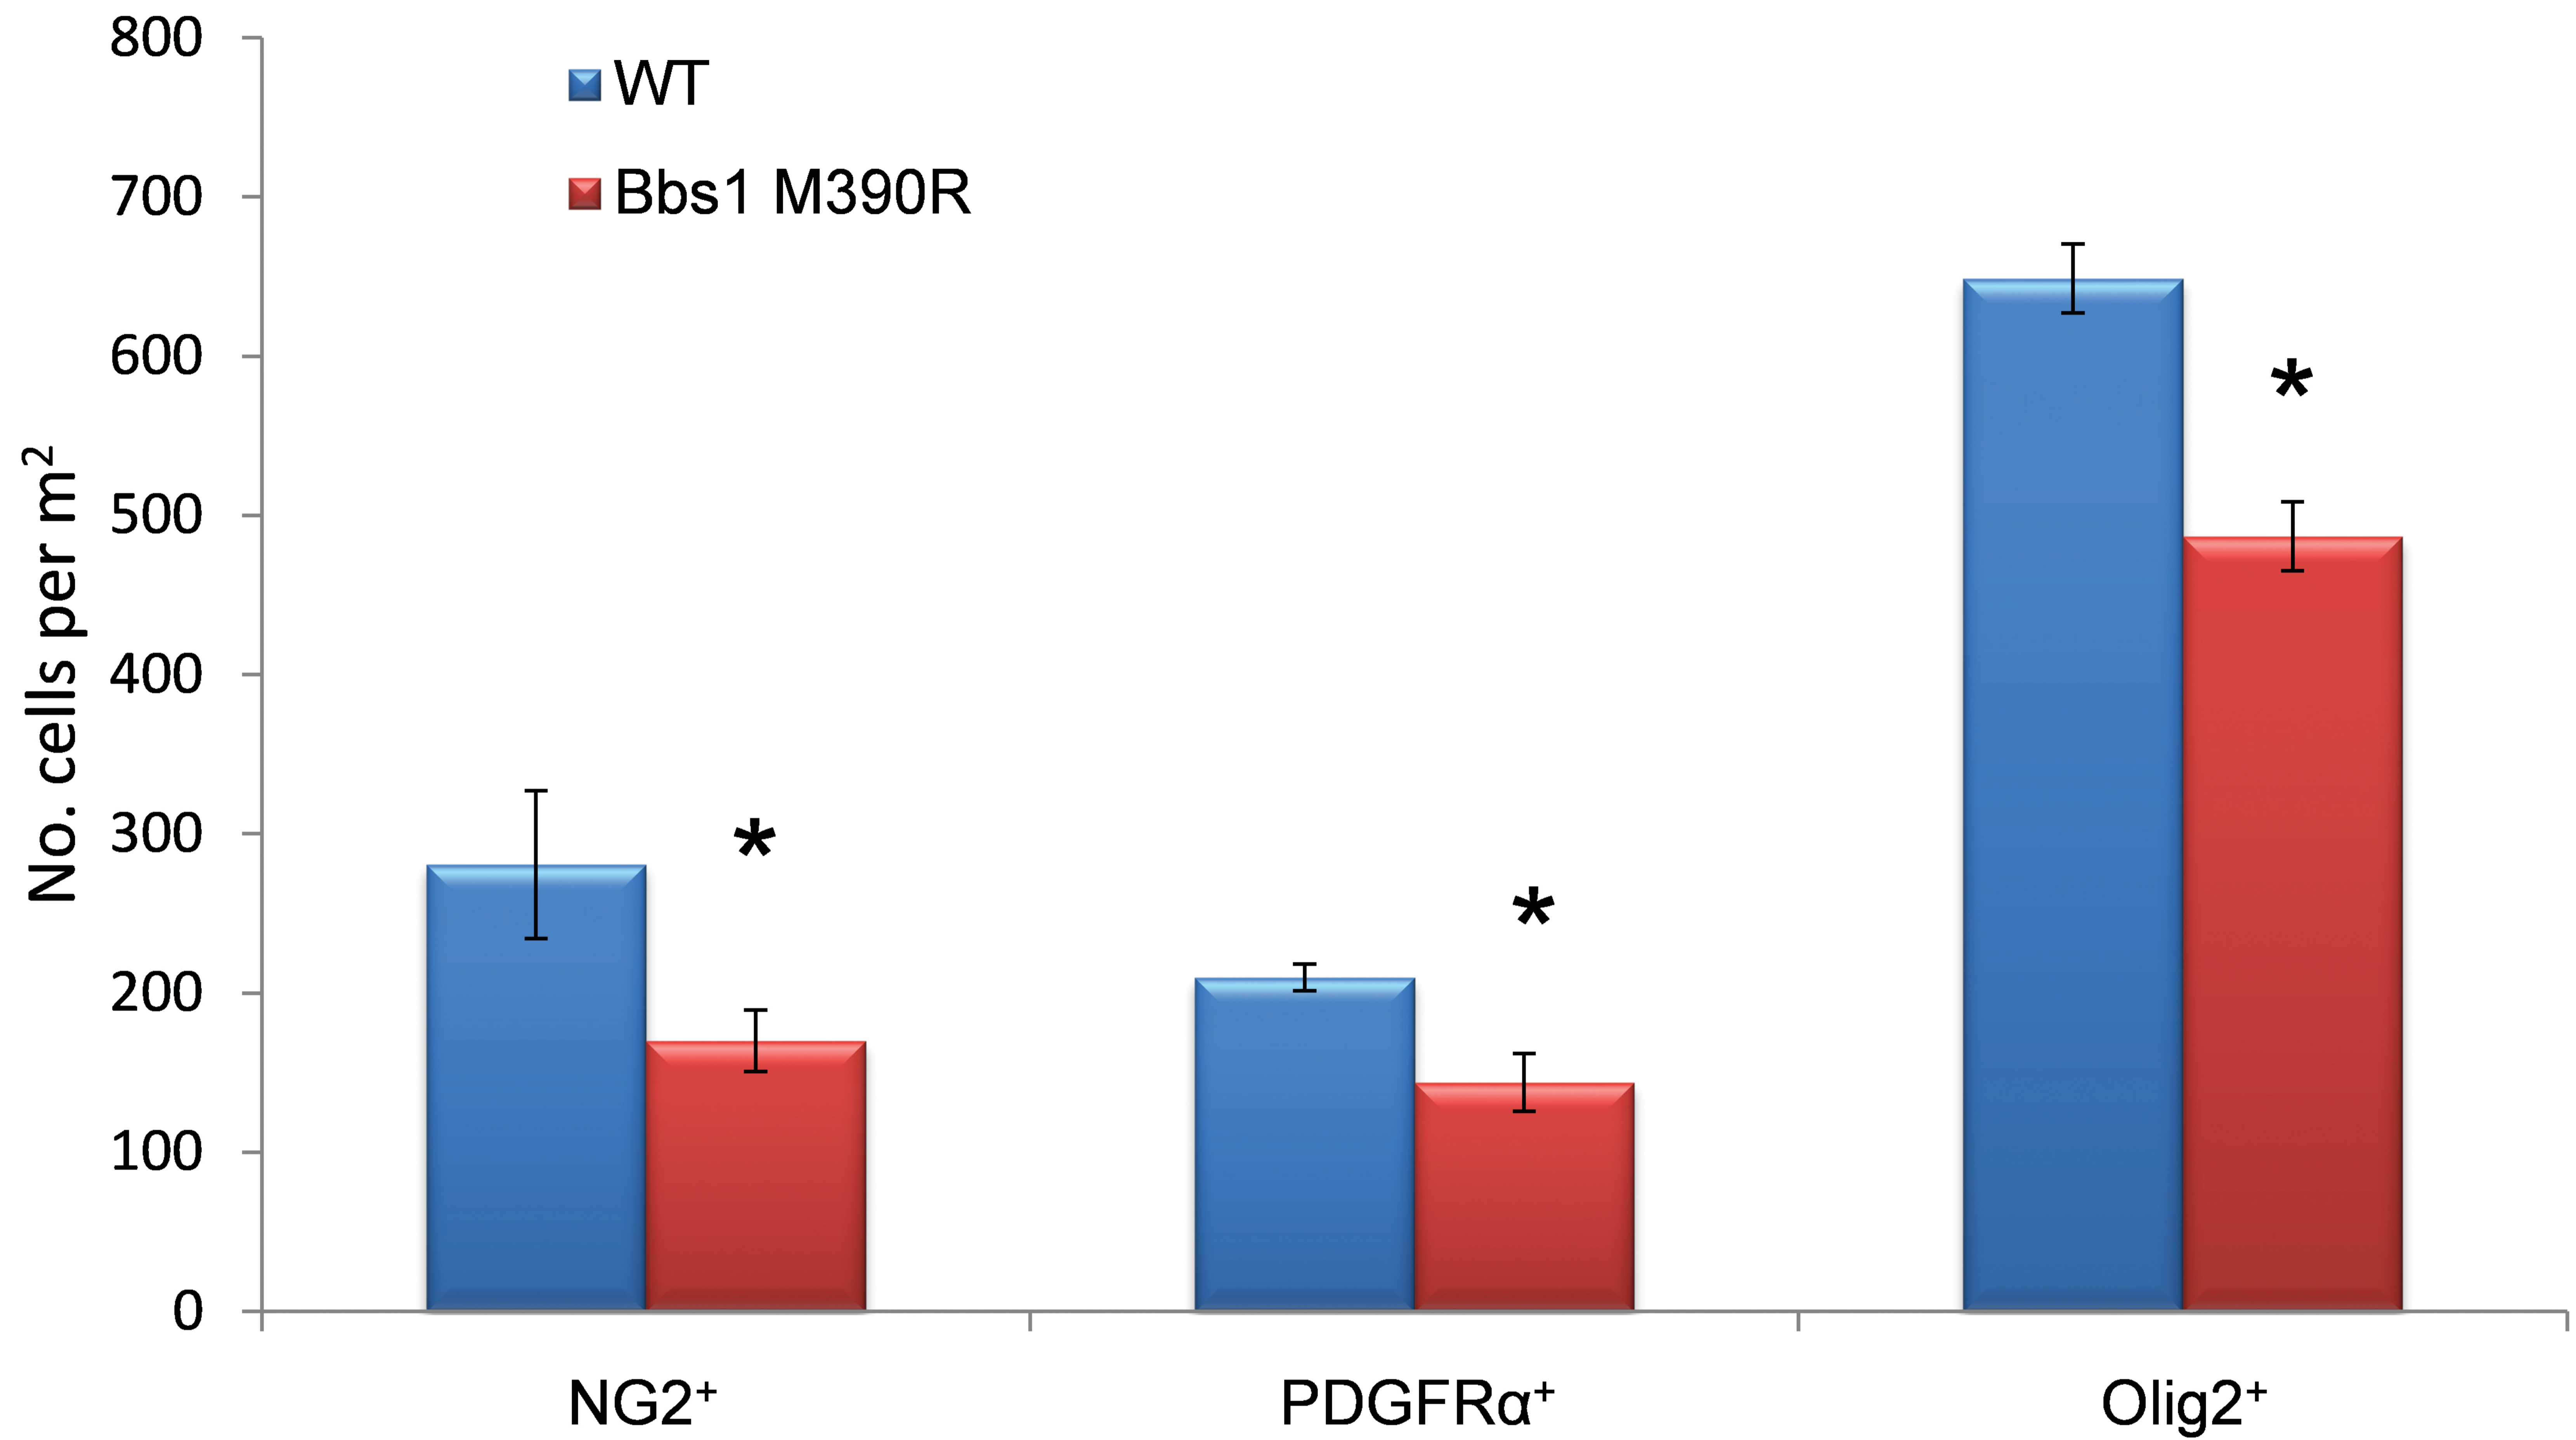

Supplementary Figure 3

**Supplementary Figure 3** Reduced populations of NG2<sup>+</sup>, PDGFR $\alpha$ <sup>+</sup> and Olig2<sup>+</sup> cells in the SVZ of Bbs1<sup>M390R/M390R</sup> mice. Quantitations of NG2<sup>+</sup>, PDGFR $\alpha$ <sup>+</sup> and Olig2<sup>+</sup> cells per area in the SVZ of post-natal day 3 Bbs1<sup>M390R/M390R</sup> mice reveal significantly fewer populations of all three cell types relative to WT mice. Representative images for these analyses may be observed in **Fig. 3b** (NG2<sup>+</sup>, PDGFR $\alpha$ <sup>+</sup> and Olig2<sup>+</sup> cells in green). We analyzed at least 3 mice per group and genotype. All error bars represent s.e.m. \*p<0.05, results from unpaired *t* tests. LV, lateral ventricle; SVZ, subventricular zone.

**a**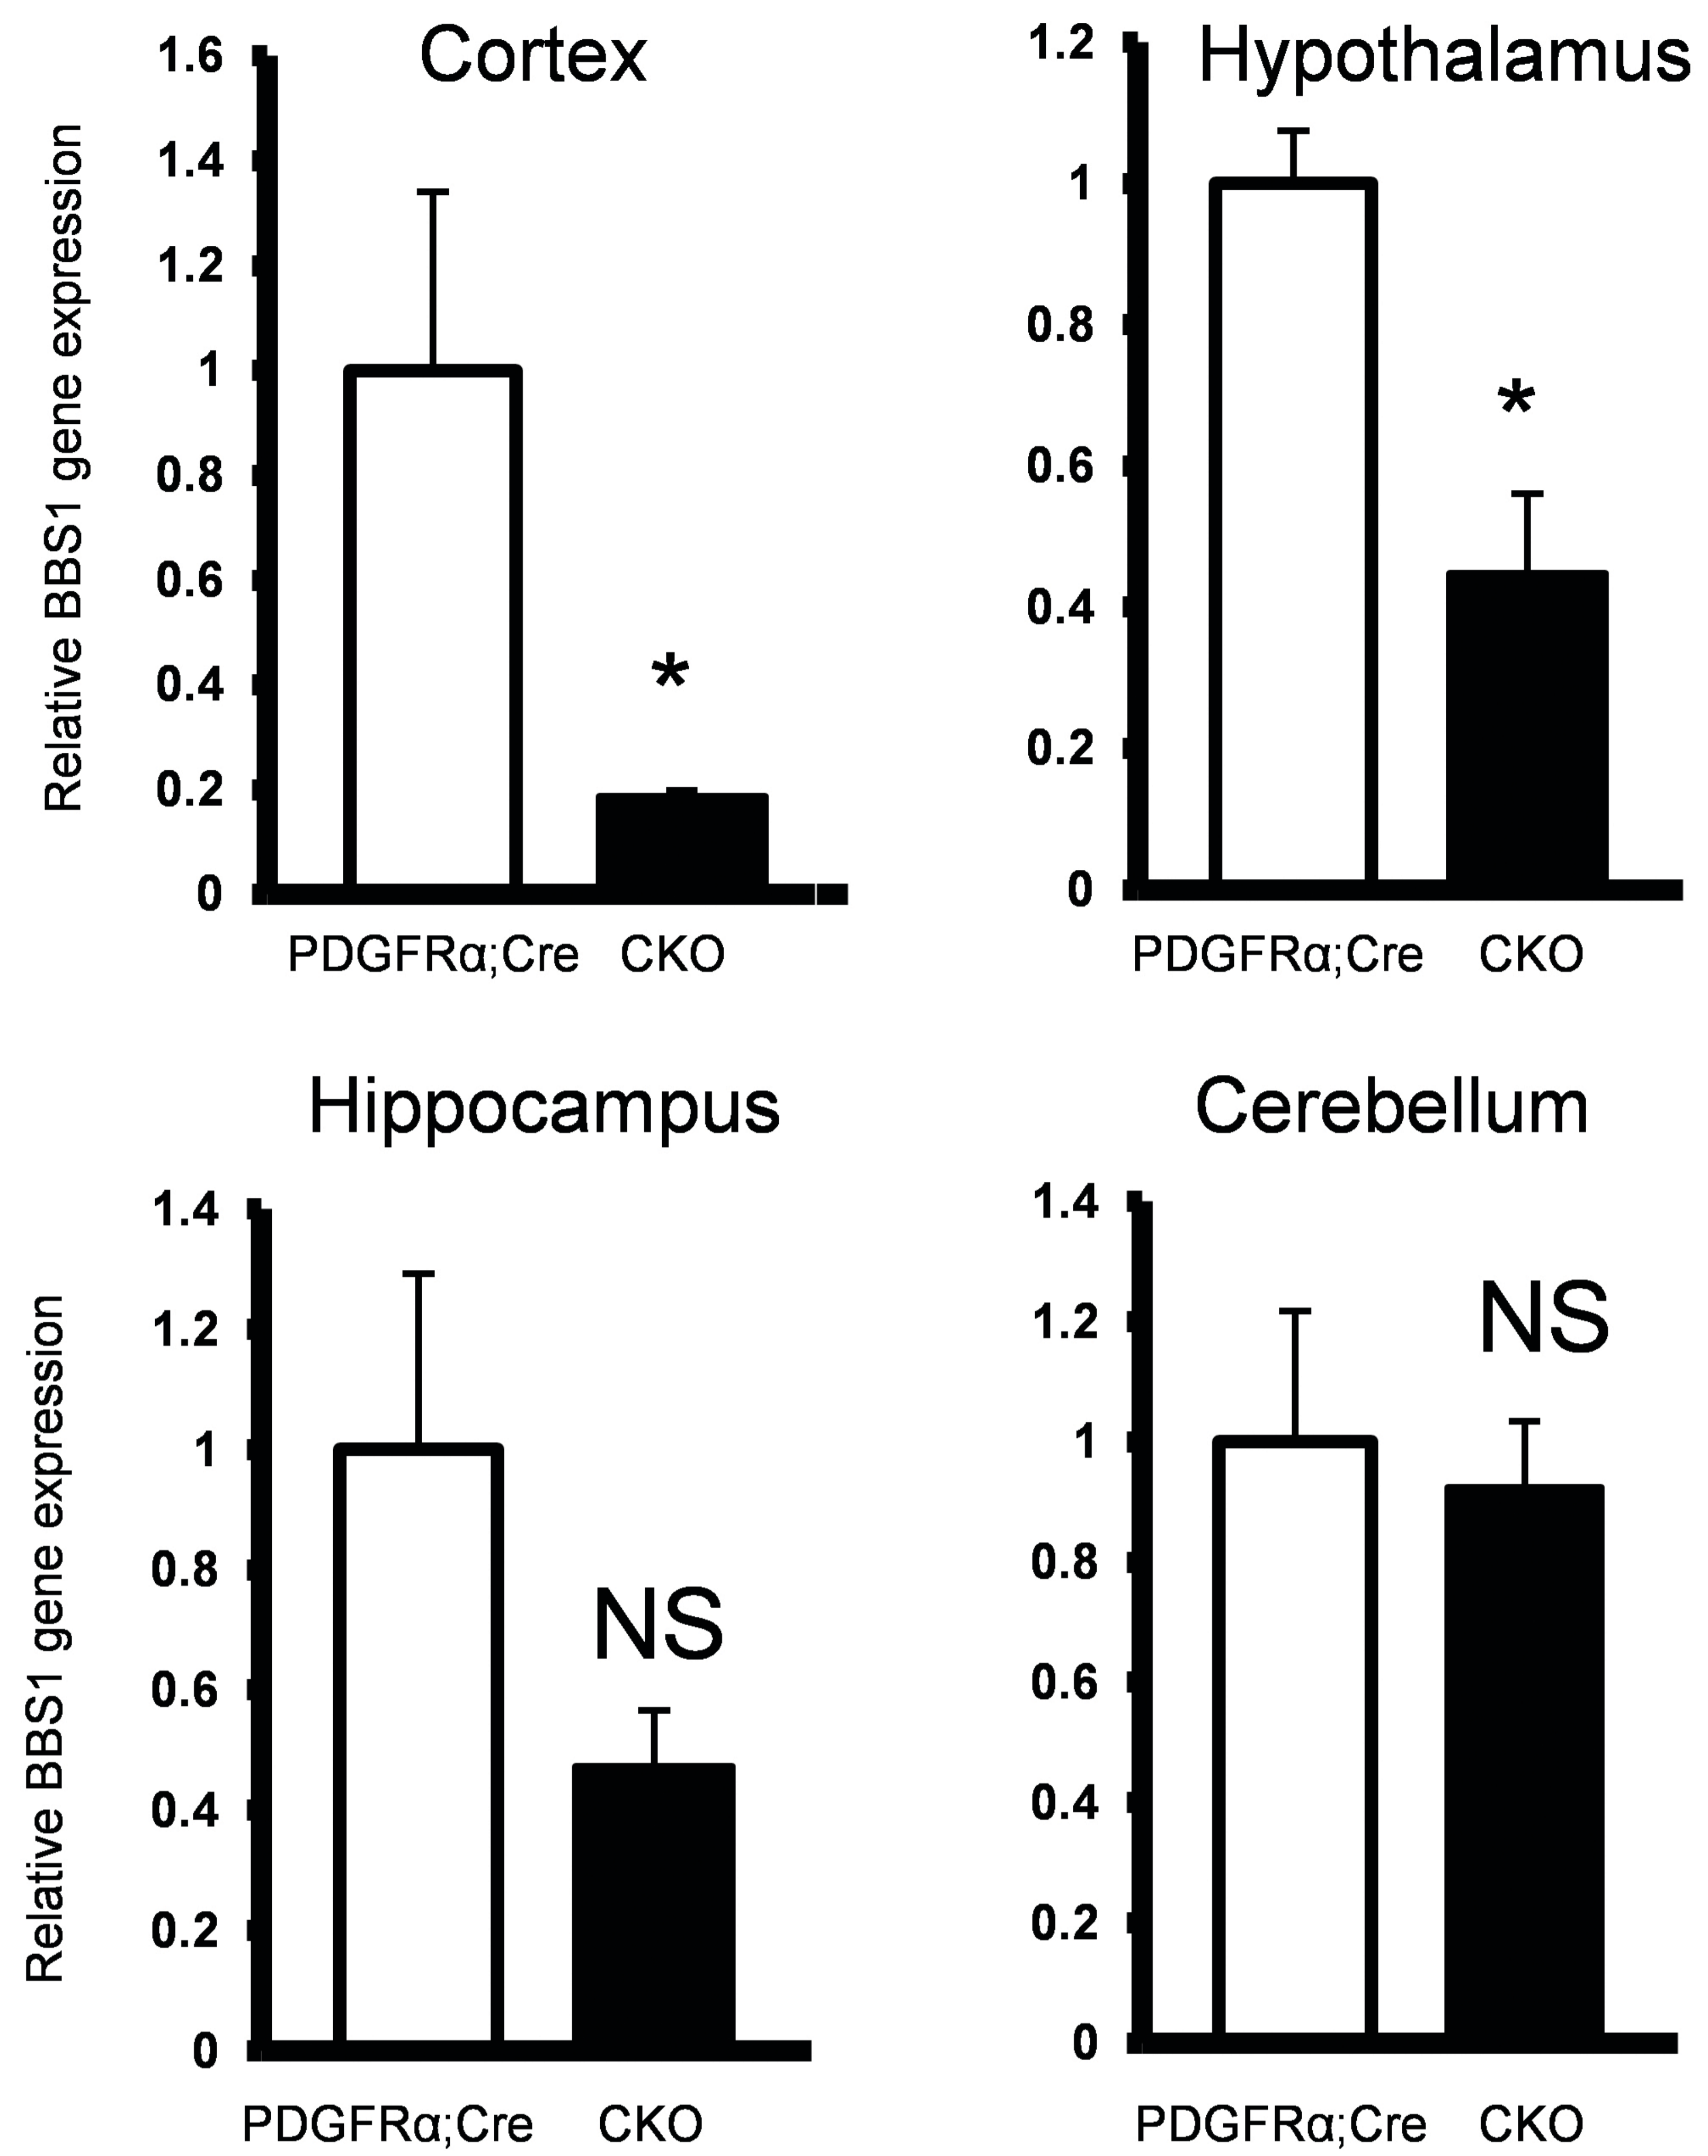**c**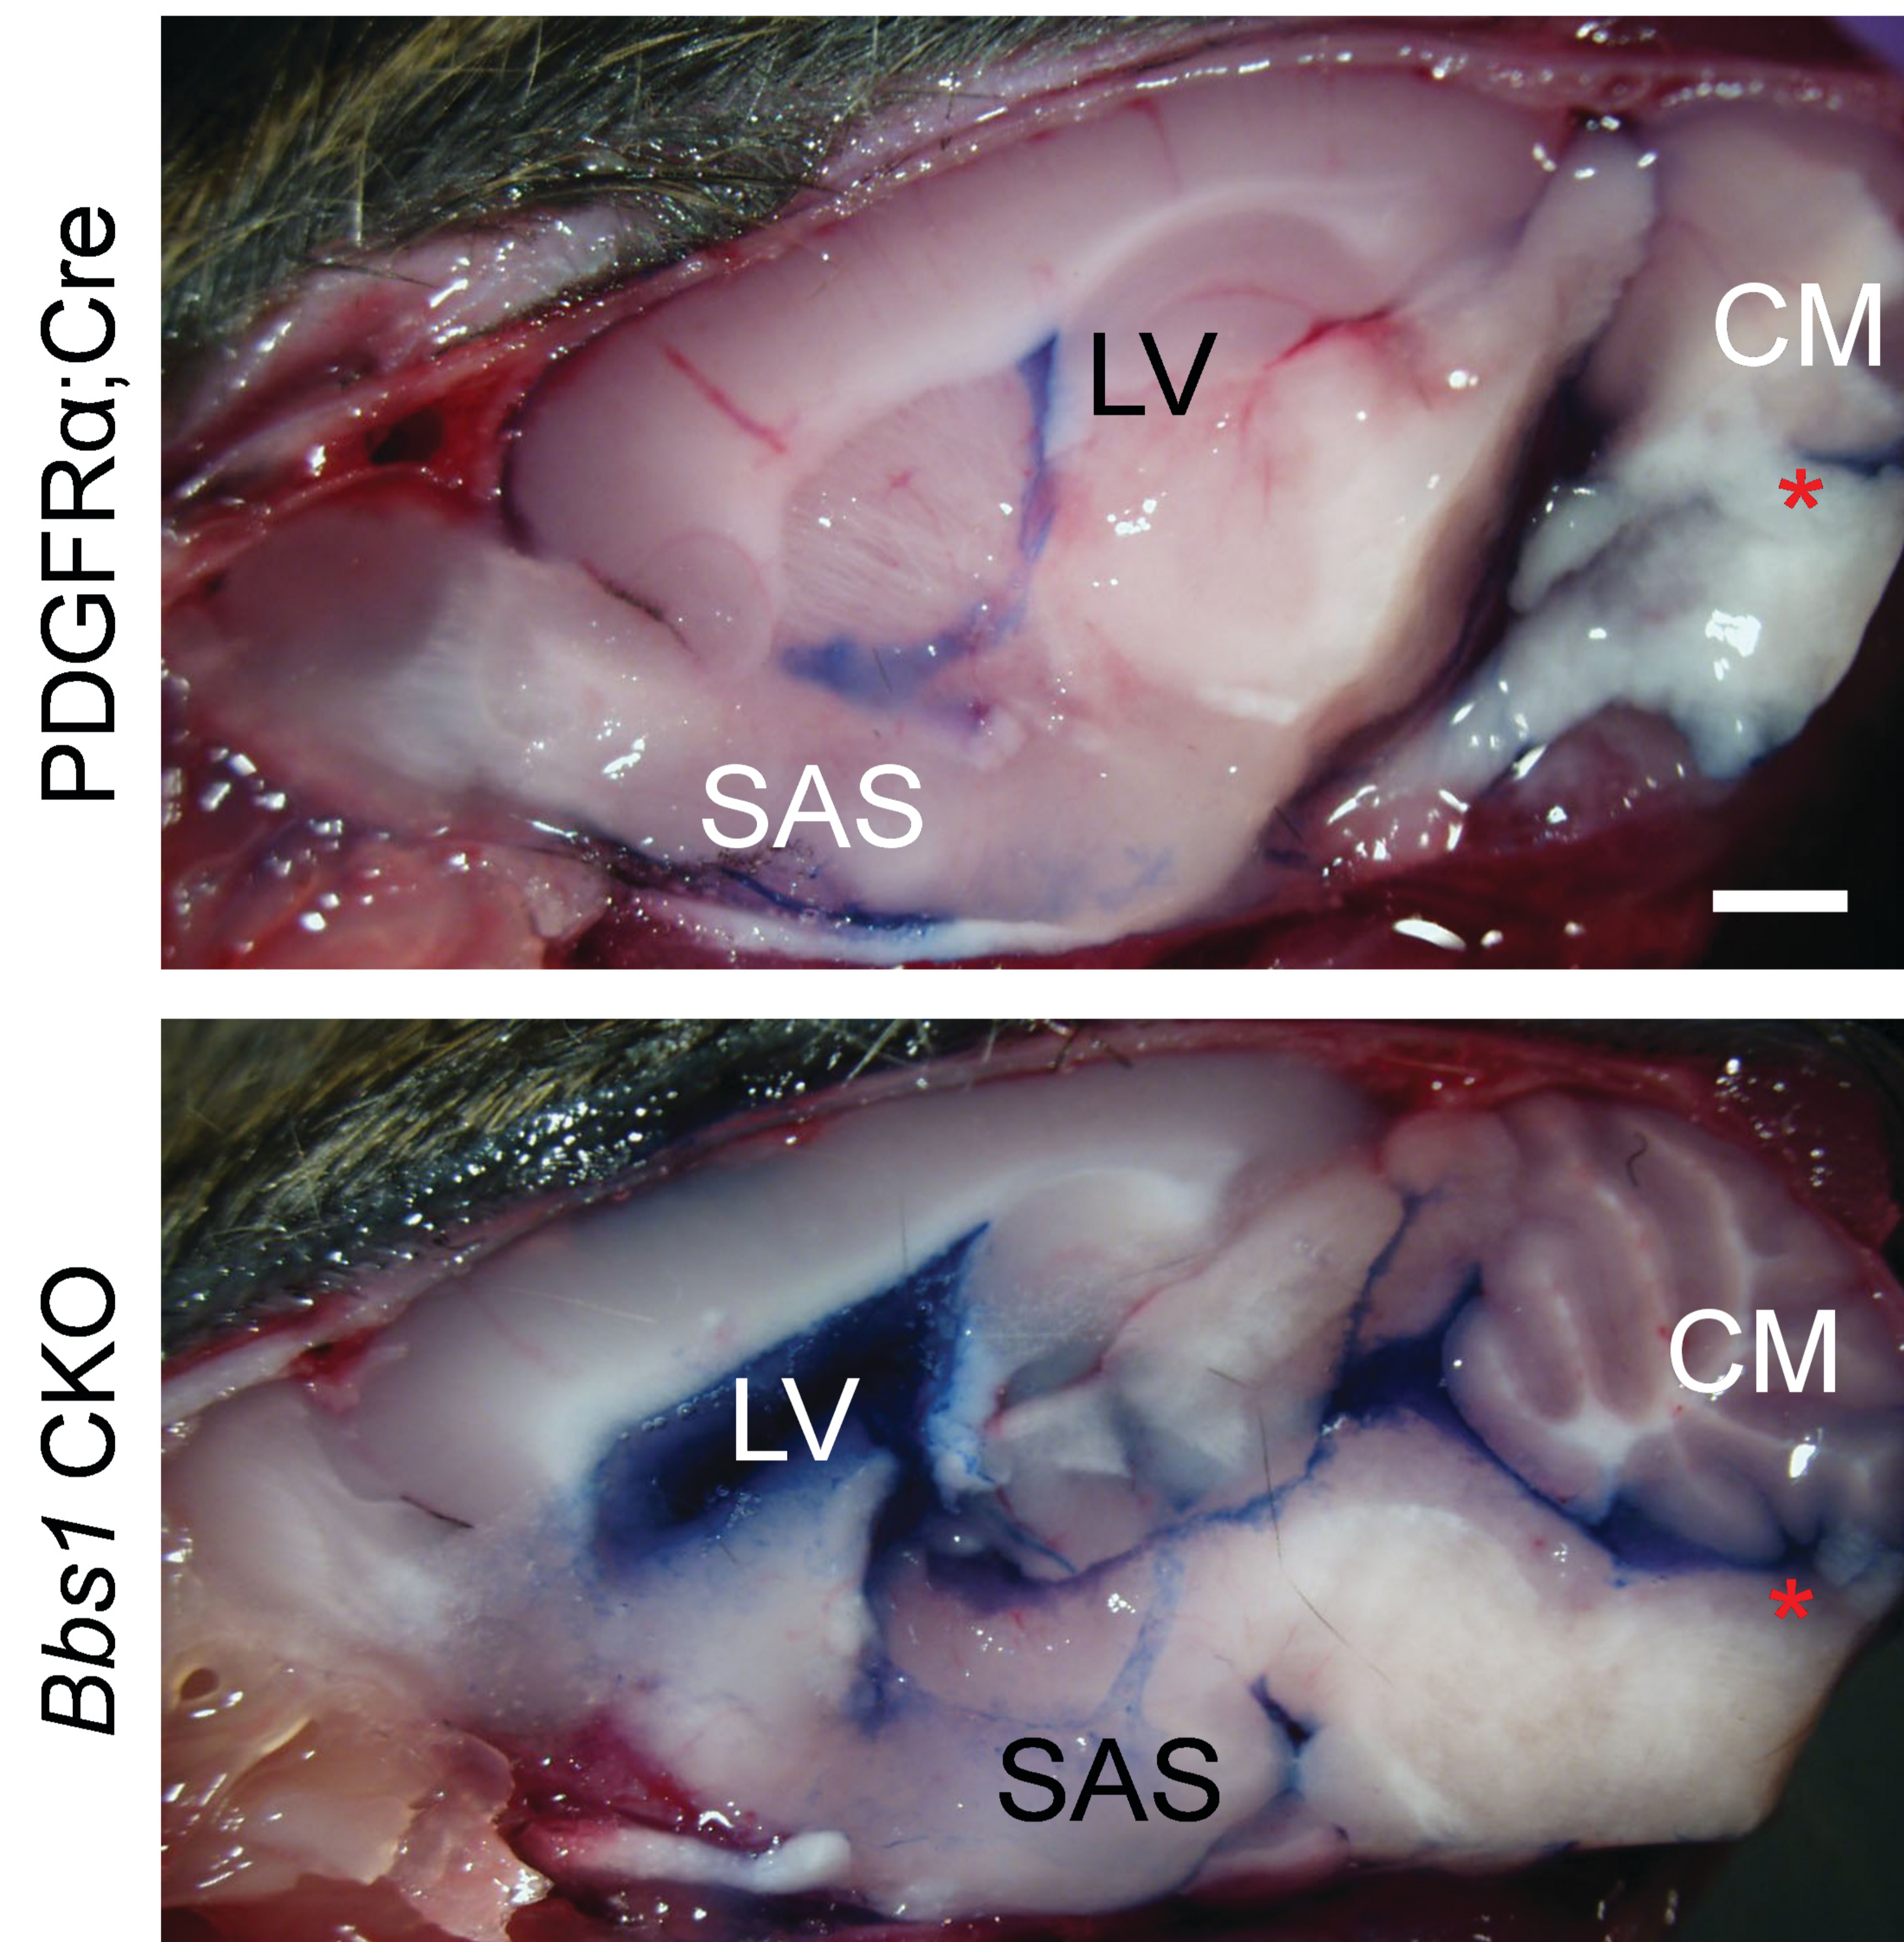**d**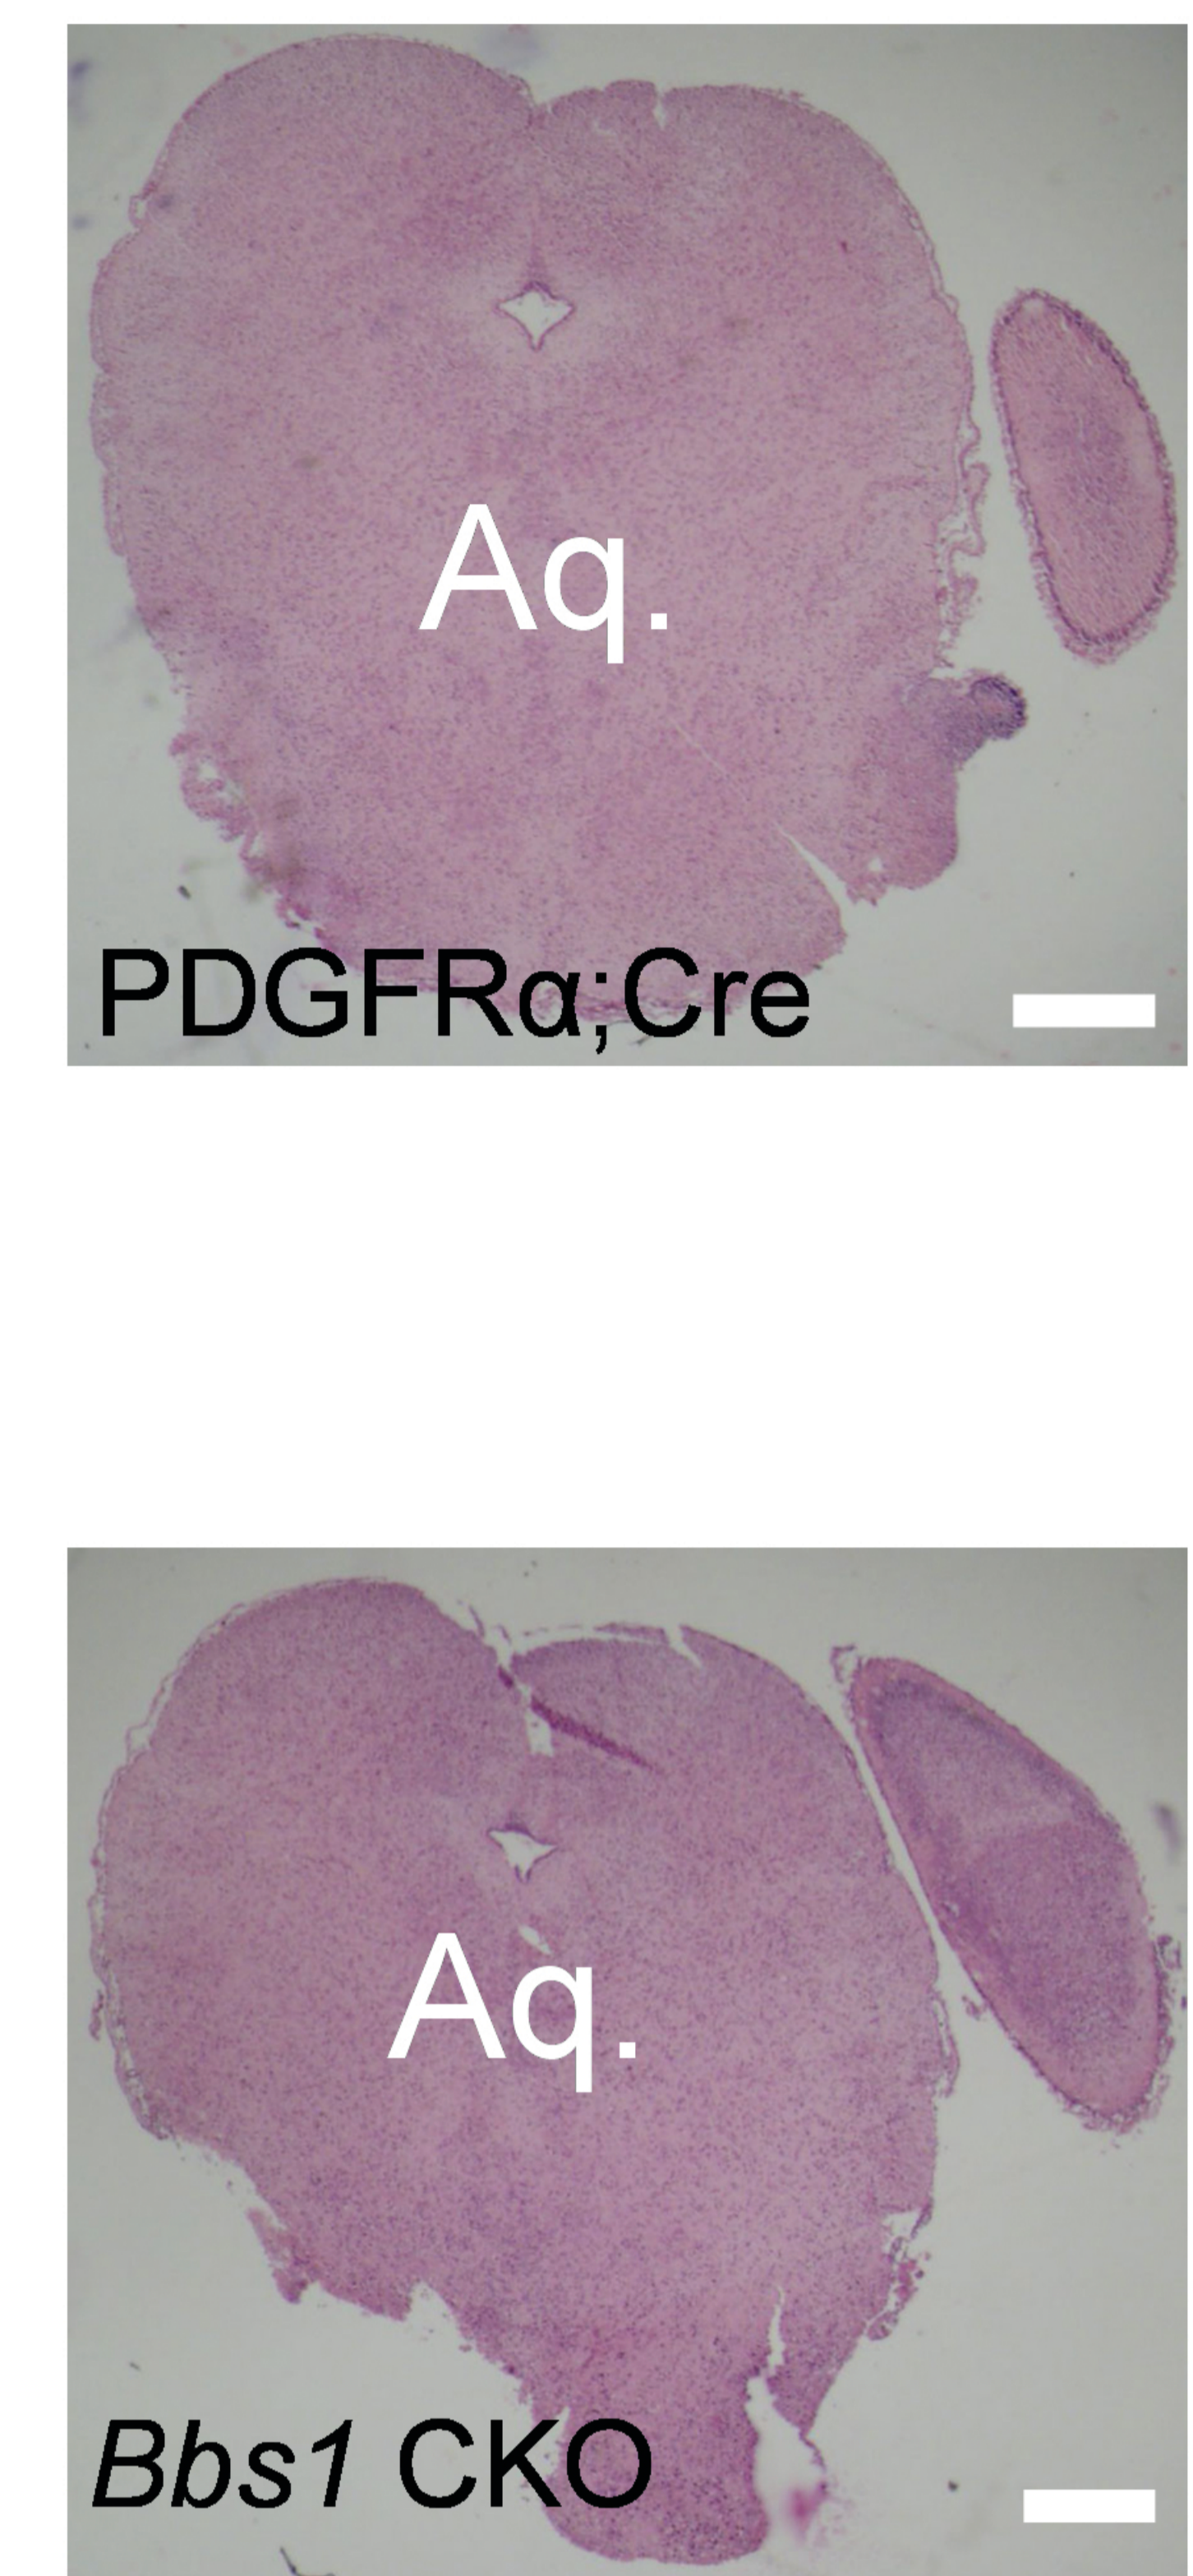**b**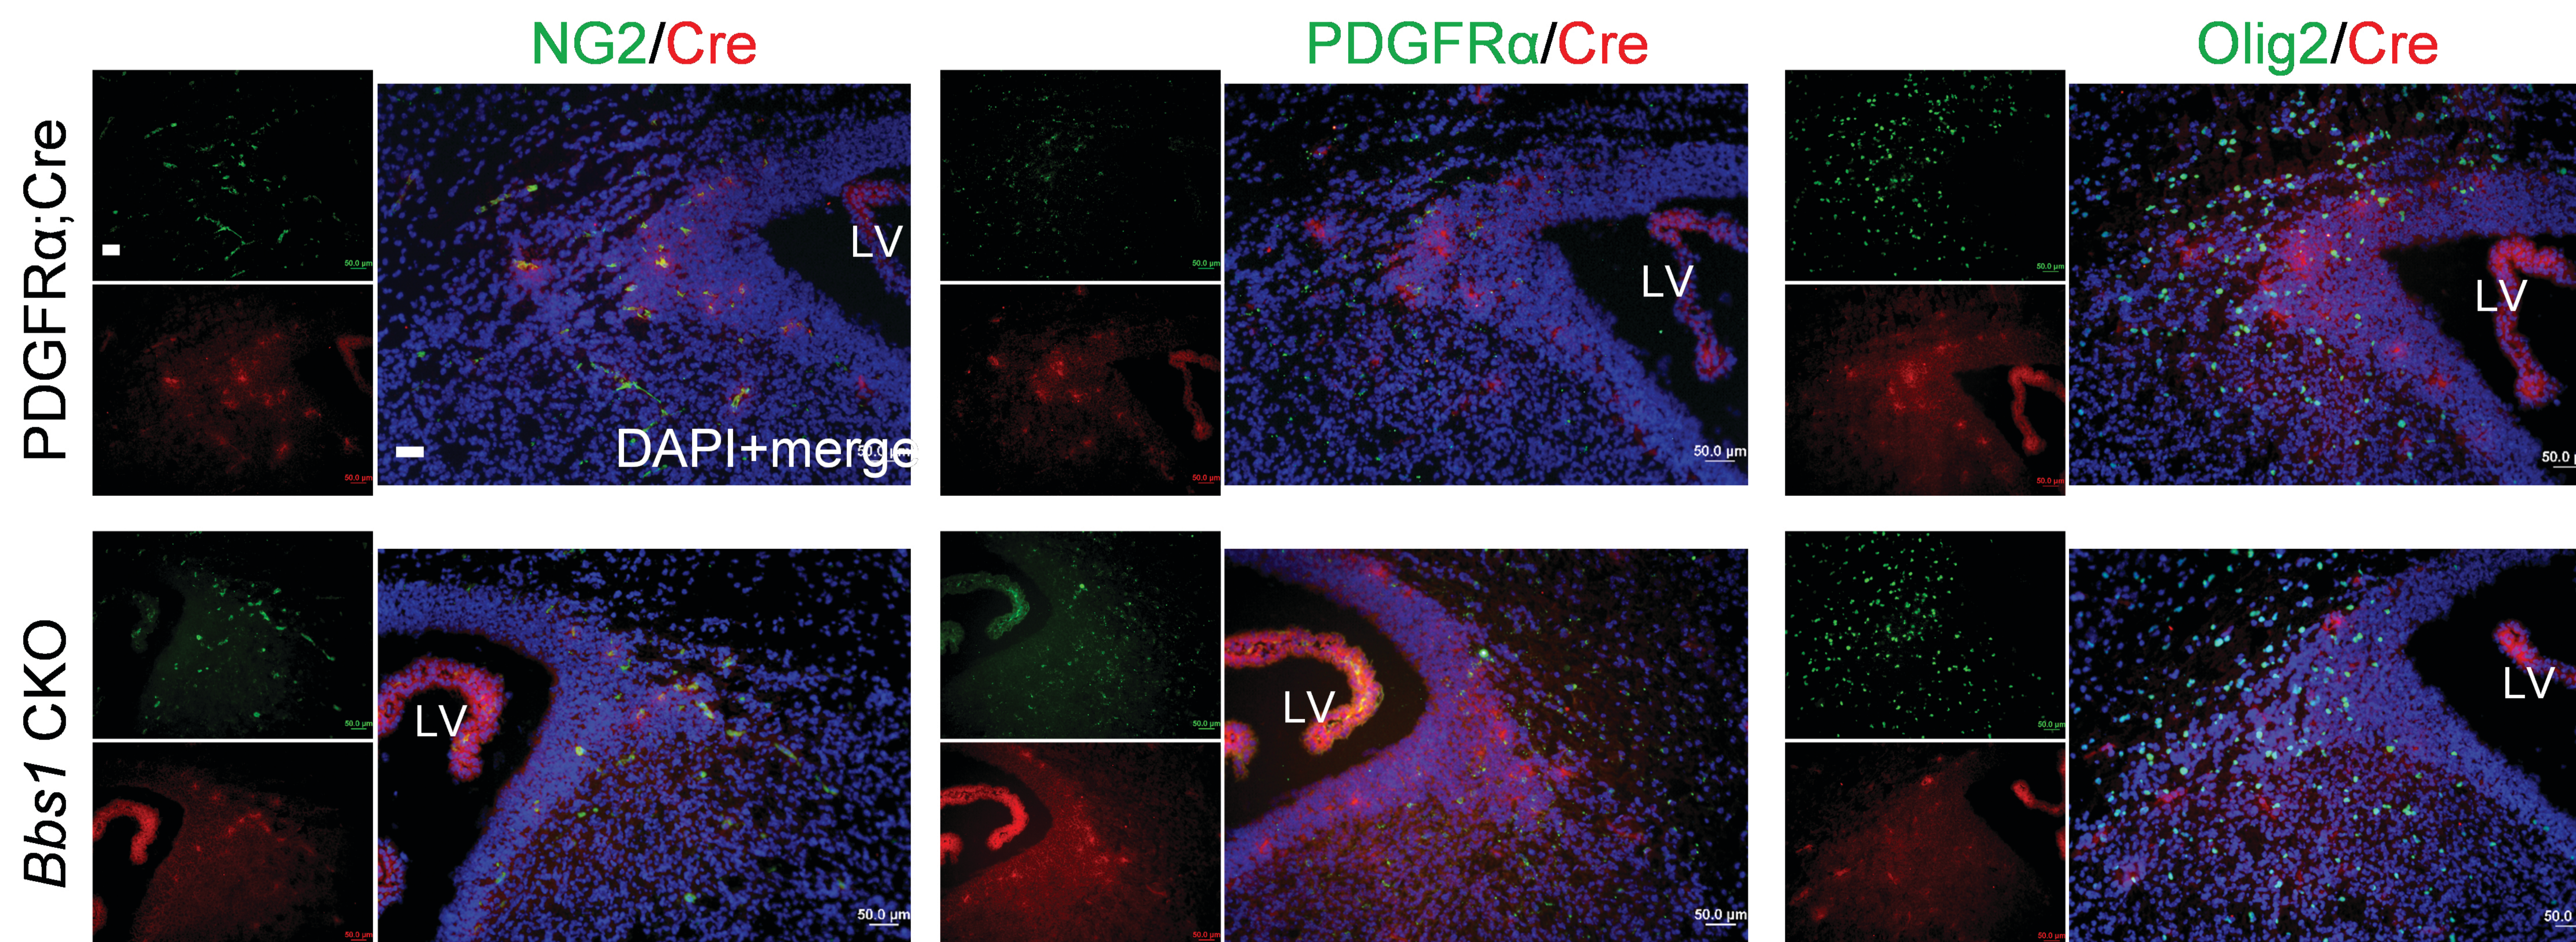

Supplementary  
Figure 4



**Supplementary Figure 4** Conditional *Bbs1* knockout in neural progenitors leads to communicating hydrocephalus. **(a)** Quantitations of *Bbs1* mRNA levels in four brain regions showing significant reductions in the cortex and hypothalamus in adult *Bbs1*<sup>CKO</sup> mice relative to PDGFR $\alpha$ ;Cre (control). **(b)** Representative immunofluorescent images showing that Cre protein (red) is expressed in periventricular regions, specifically in neural progenitor cells expressing NG2, PDGFR $\alpha$  and Olig2 in both post-natal day 3 PDGFR $\alpha$ ;Cre and *Bbs1*<sup>CKO</sup> mice. Cre is not present in ependymal cells lining the ventricles. **(c)** Representative images following Evan's blue dye injections into the lateral ventricles. Dye is present throughout the ventricular system and subarachnoid spaces in both the PDGFR $\alpha$ ;Cre and the hydrocephalic *Bbs1*<sup>CKO</sup> adult brains indicating normal ventricular outflow in both mice and communicating (non-obstructive) hydrocephalus in *Bbs1*<sup>CKO</sup> mice. **(d)** Histology in P0 pups showing patent cerebral aqueduct. Scale bars equal 50  $\mu$ m **(b)**, 1 mm **(c)** and 500  $\mu$ m **(d)**. All error bars represent s.e.m. \*p<0.05, results from unpaired *t* tests. 3V, third ventricle; CKO, conditional knockout; CM, cisterna magna; LV, lateral ventricle; P, postnatal day

**a**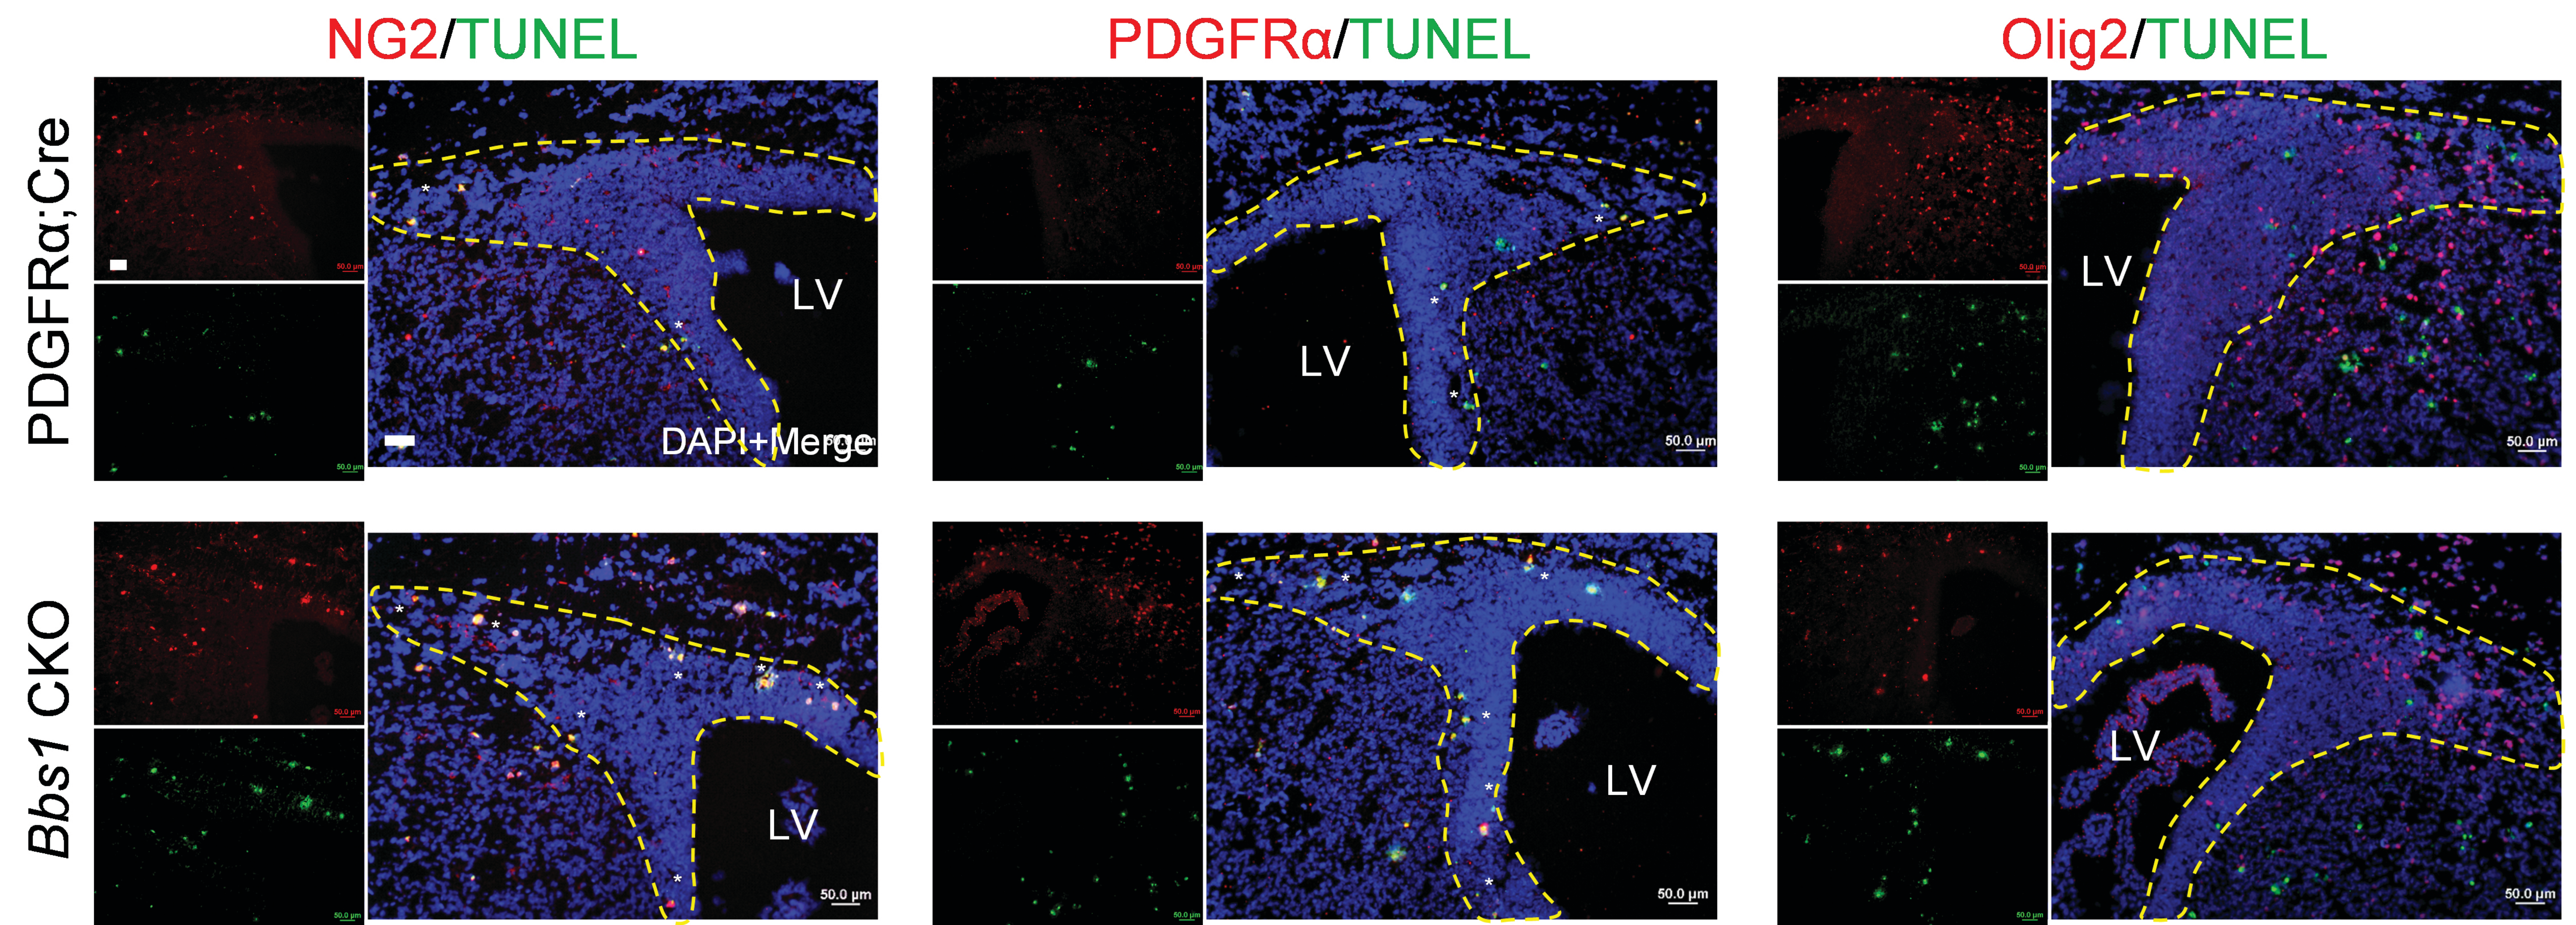**b**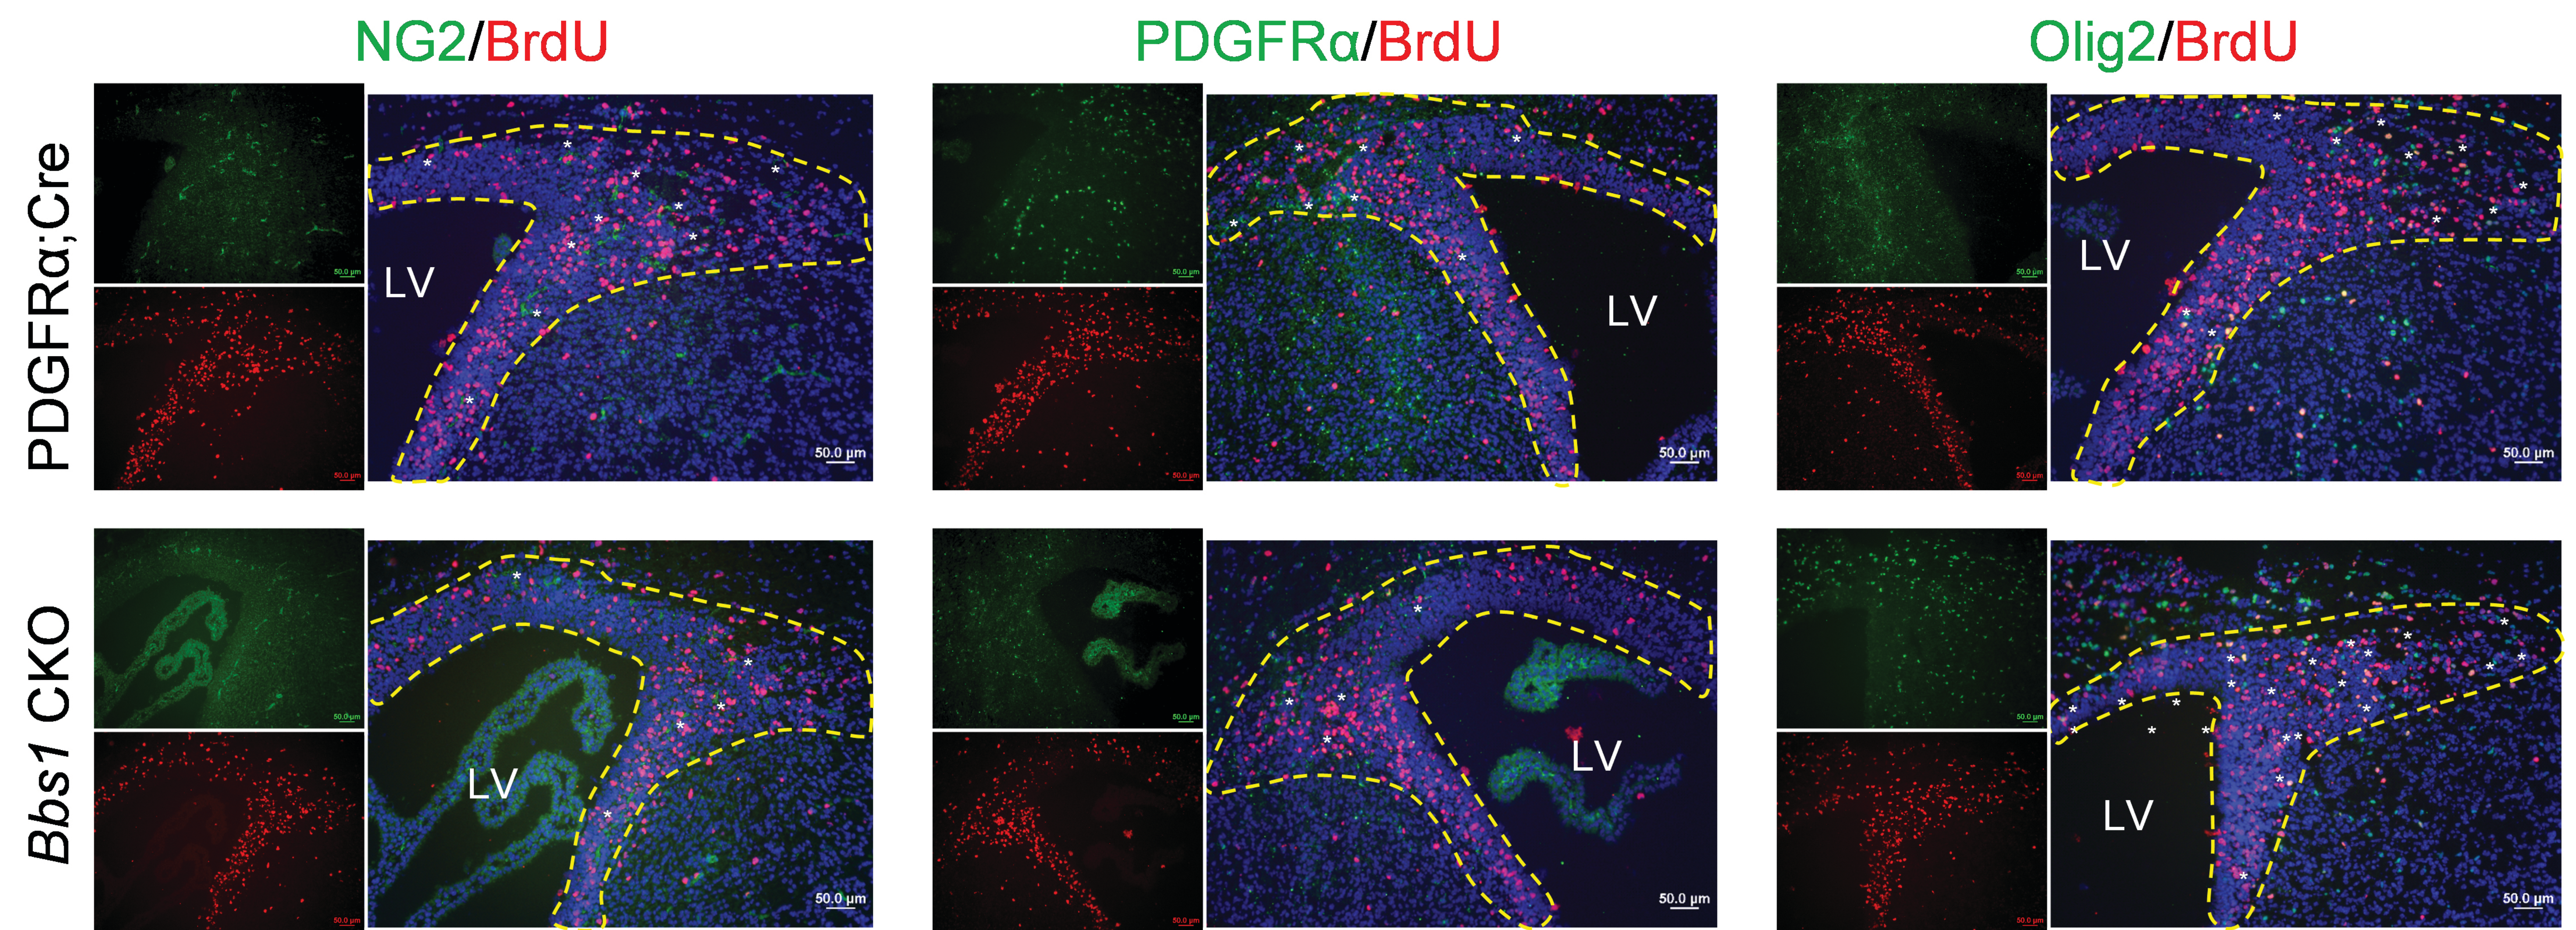

Supplementary Figure 5

**Supplementary Figure 5** Conditional *Bbs1* knockout disrupts development of NG2<sup>+</sup>PDGFR $\alpha$ <sup>+</sup> neural progenitor cells. **(a,b)** Representative immunofluorescent images showing more NG2<sup>+</sup> and PDGFR $\alpha$ <sup>+</sup> cells labeled with TUNEL **(a, green)** and fewer NG2<sup>+</sup> and PDGFR $\alpha$ <sup>+</sup> cells labeled with BrdU **(b, red)** in the SVZ of post-natal day 3 PDGFR $\alpha$ ;Cre and *Bbs1*<sup>CKO</sup> brains. No difference was observed between PDGFR $\alpha$ ;Cre and *Bbs1*<sup>CKO</sup> mice in the number of Olig2<sup>+</sup> cells **(a, red and b, green)** also labeled with TUNEL **(a)** or BrdU **(b)**. All quantitations are in **Fig. 4f and i, bottom**. Scale bar equals 50  $\mu$ m **(a,b)**. CKO, conditional knockout; SVZ, subventricular zone.

**a**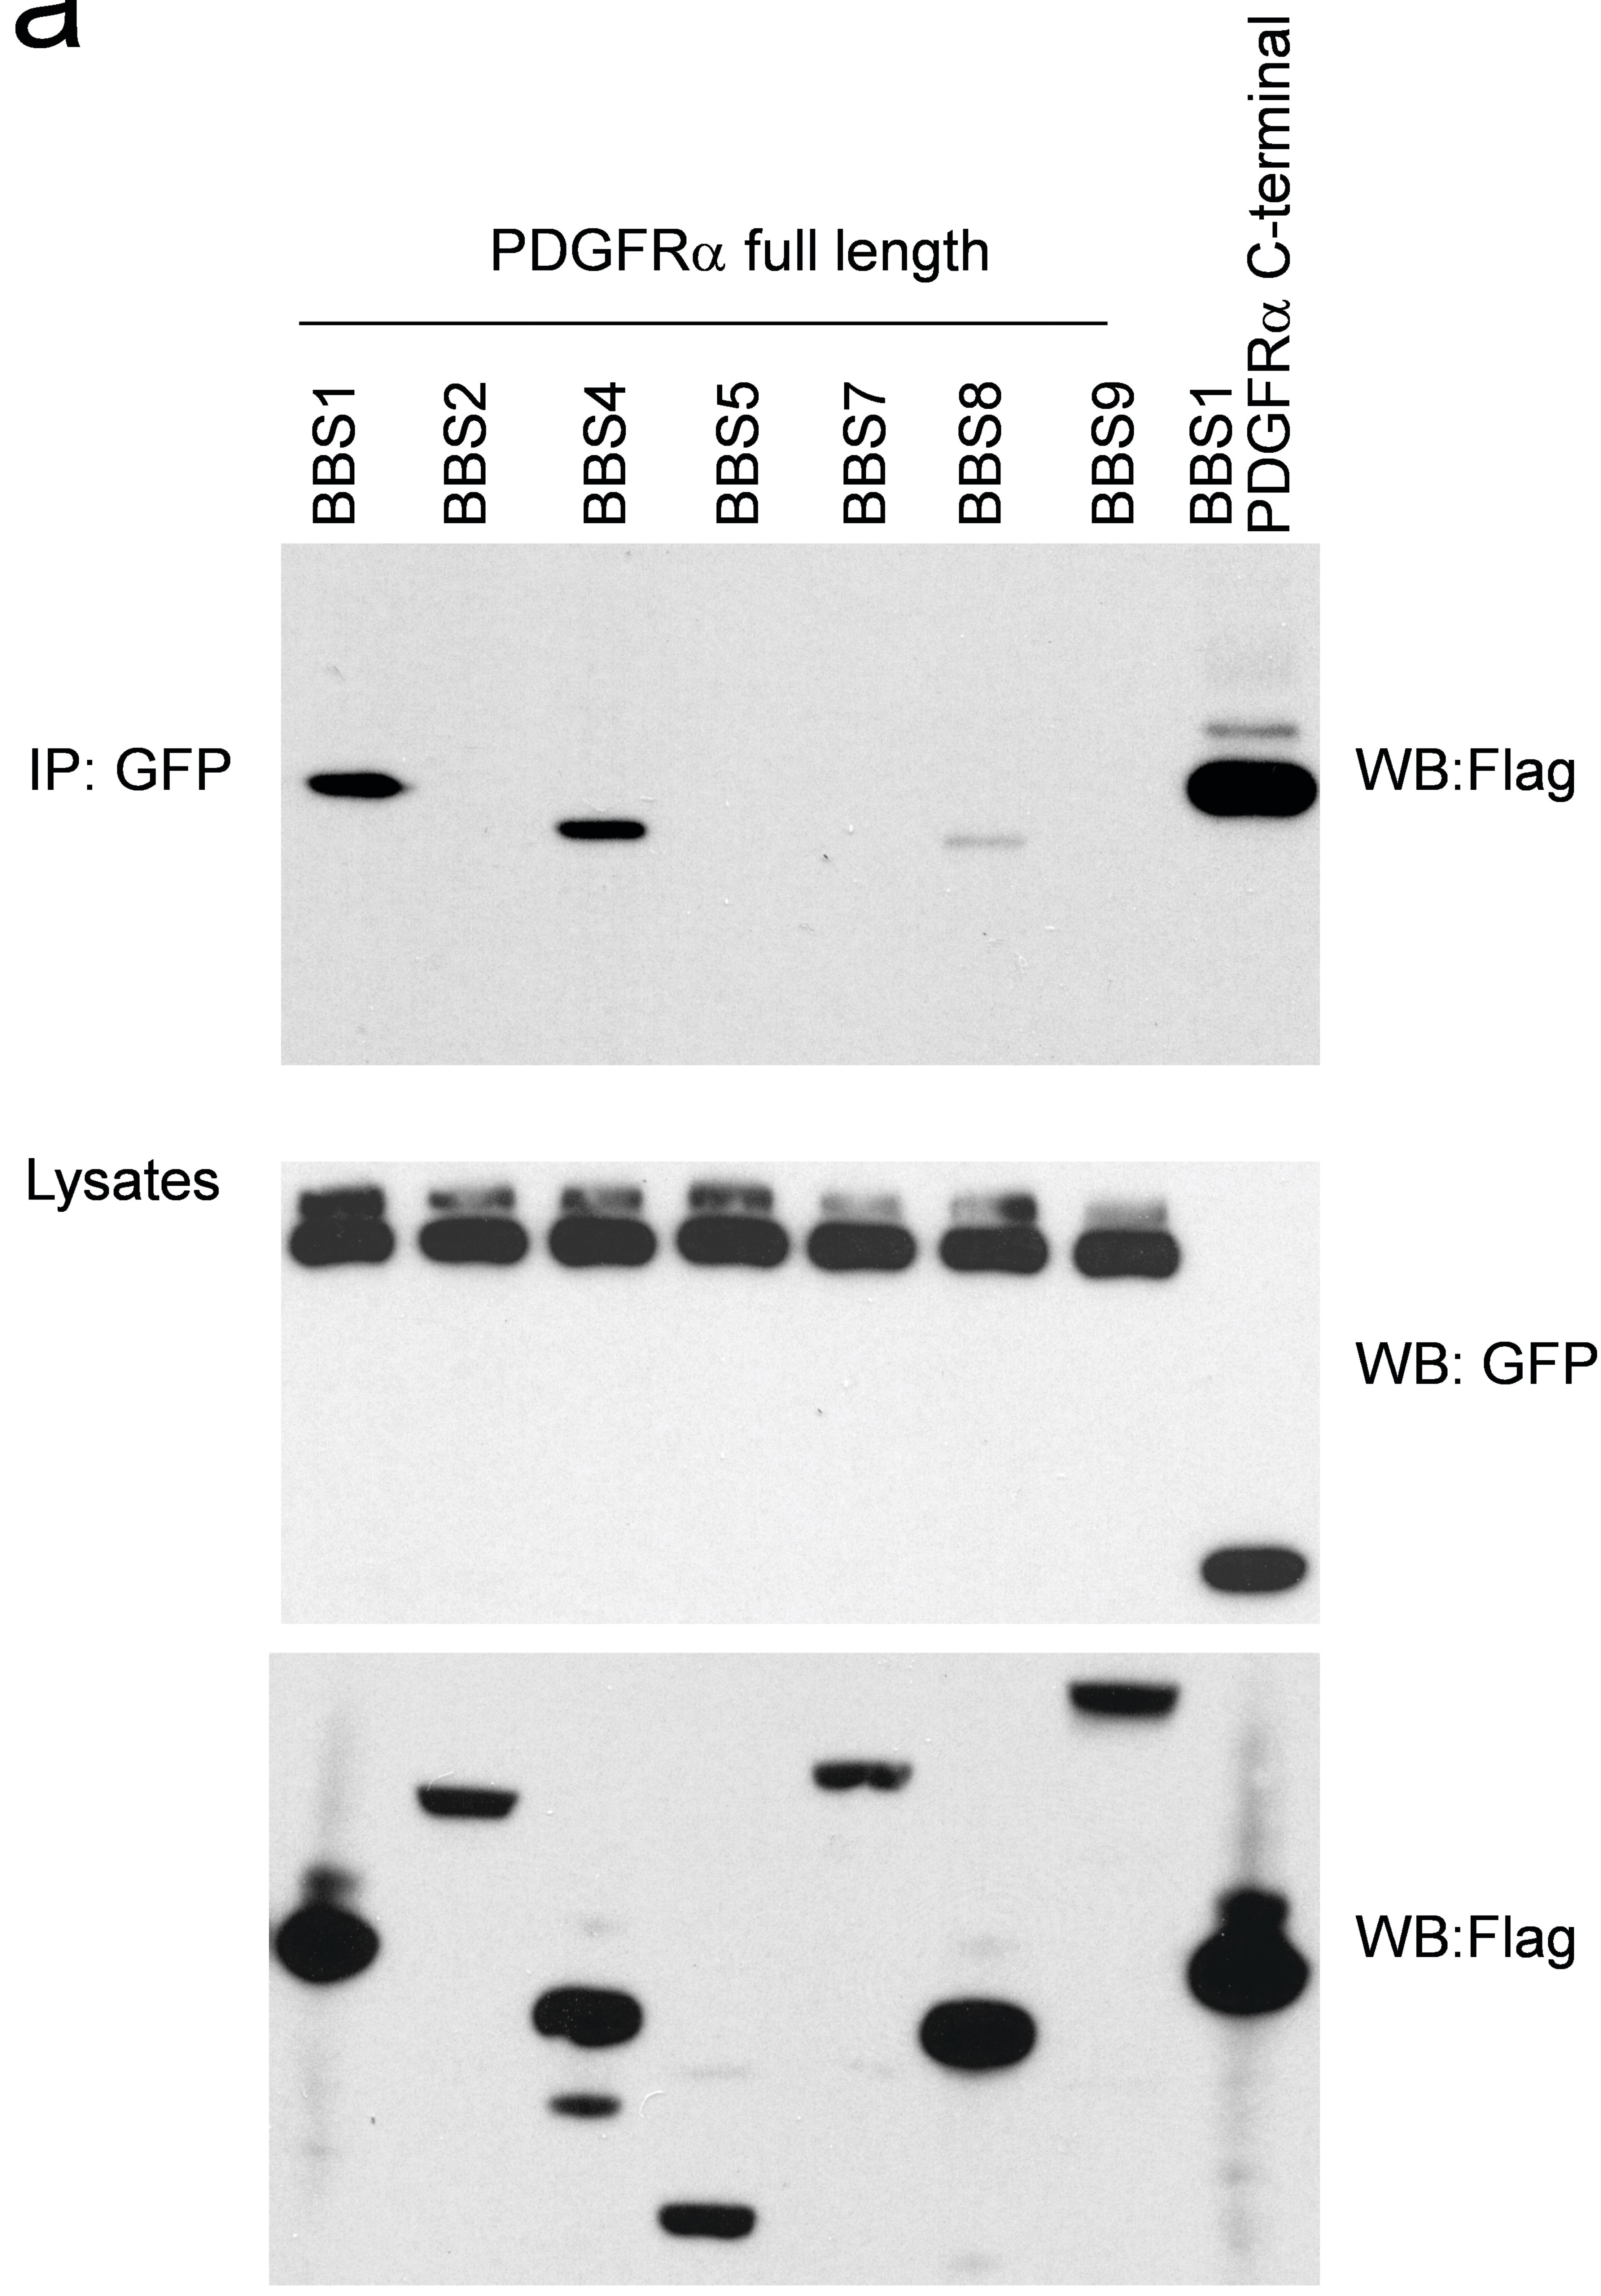**b**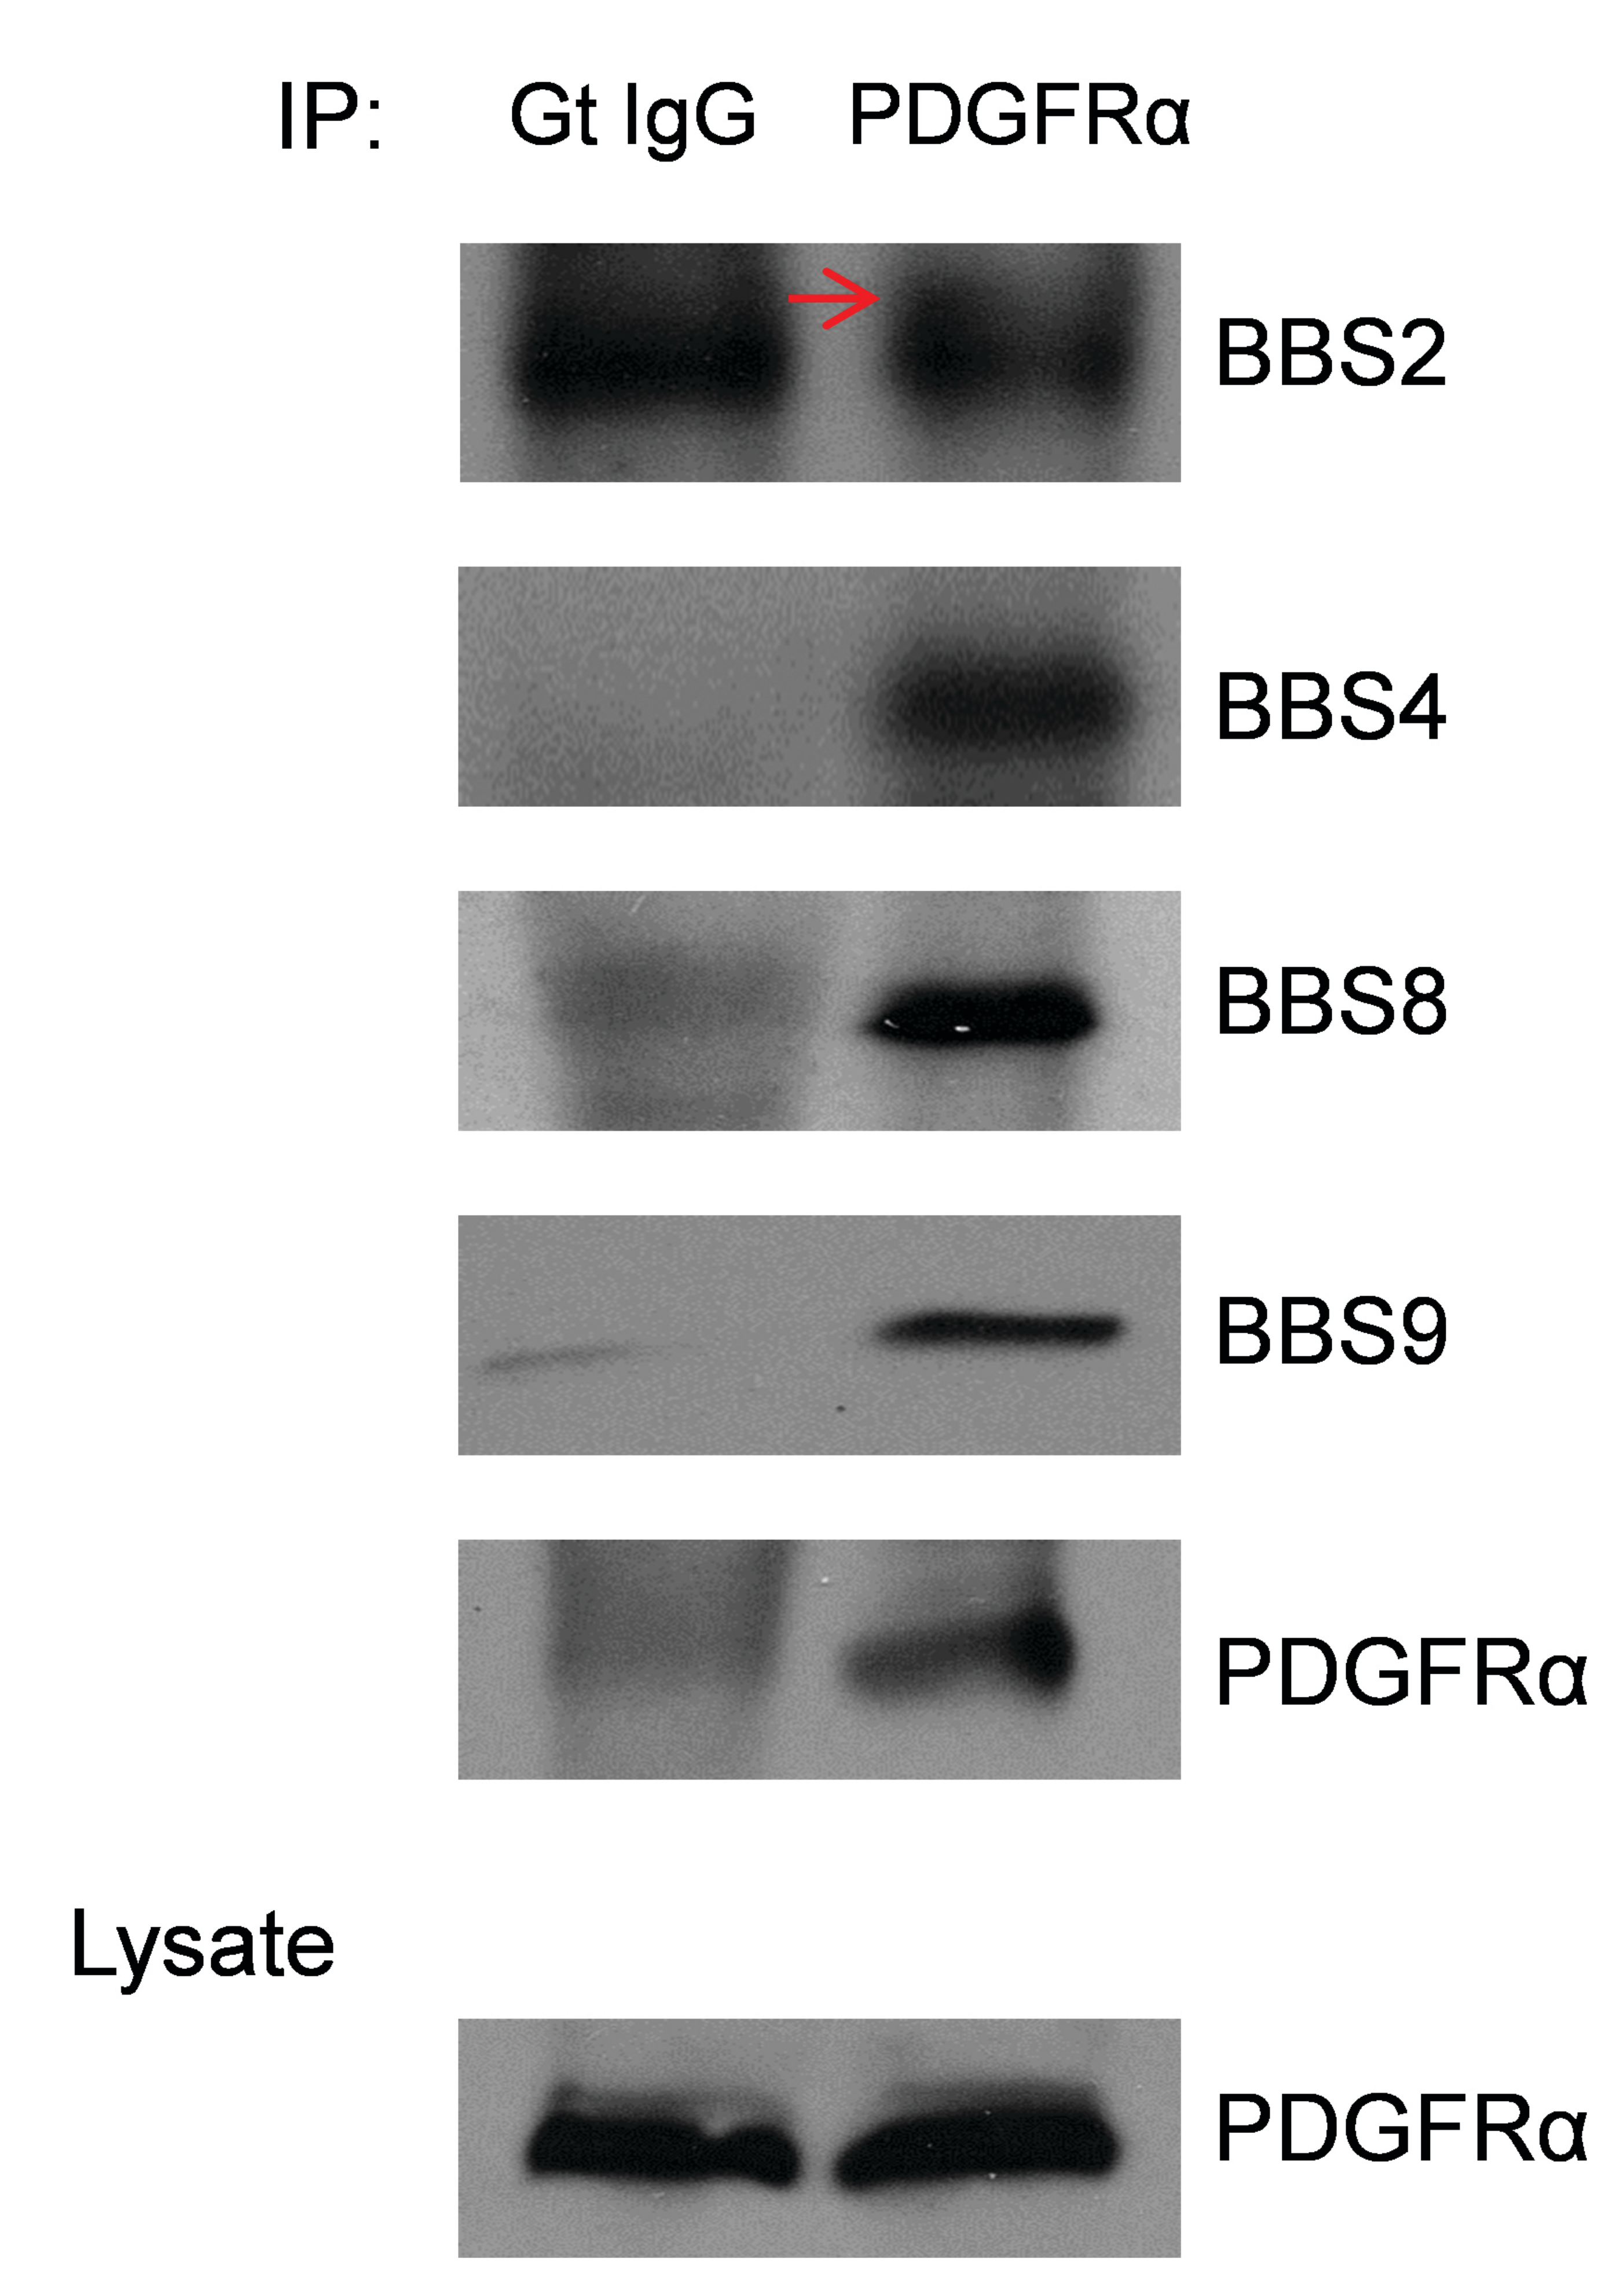

Supplementary Figure 6

**Supplementary Figure 6** PDGFR $\alpha$  interacts with BBS proteins. **(a)** Co-transfection of GFP tagged PDGFR $\alpha$  full length and cytoplasmic tail in addition to Flag tagged BBSome subunits and subsequent western blot in 293T cells illustrating an interaction between PDGFR $\alpha$  and several BBSome subunits. The interaction between PDGFR $\alpha$  and the BBSome occurs through the C-terminal cytoplasmic tail of PDGFR $\alpha$  **(b)** Endogenous PDGFR $\alpha$  immunoprecipitation in P3 mouse cortices and subsequent western blot analyses using endogenous antibodies showing BBS proteins present in the PDGFR $\alpha$  immunoprecipitated but not IgG (control) lanes. These results illustrate an endogenous interaction between PDGFR $\alpha$  and BBS 2, 4, 8 and 9. Immunoblots from total lysates using anti-PDGFR $\alpha$  show equal protein loading in both samples. IP, immunoprecipitation; WB, western blot.

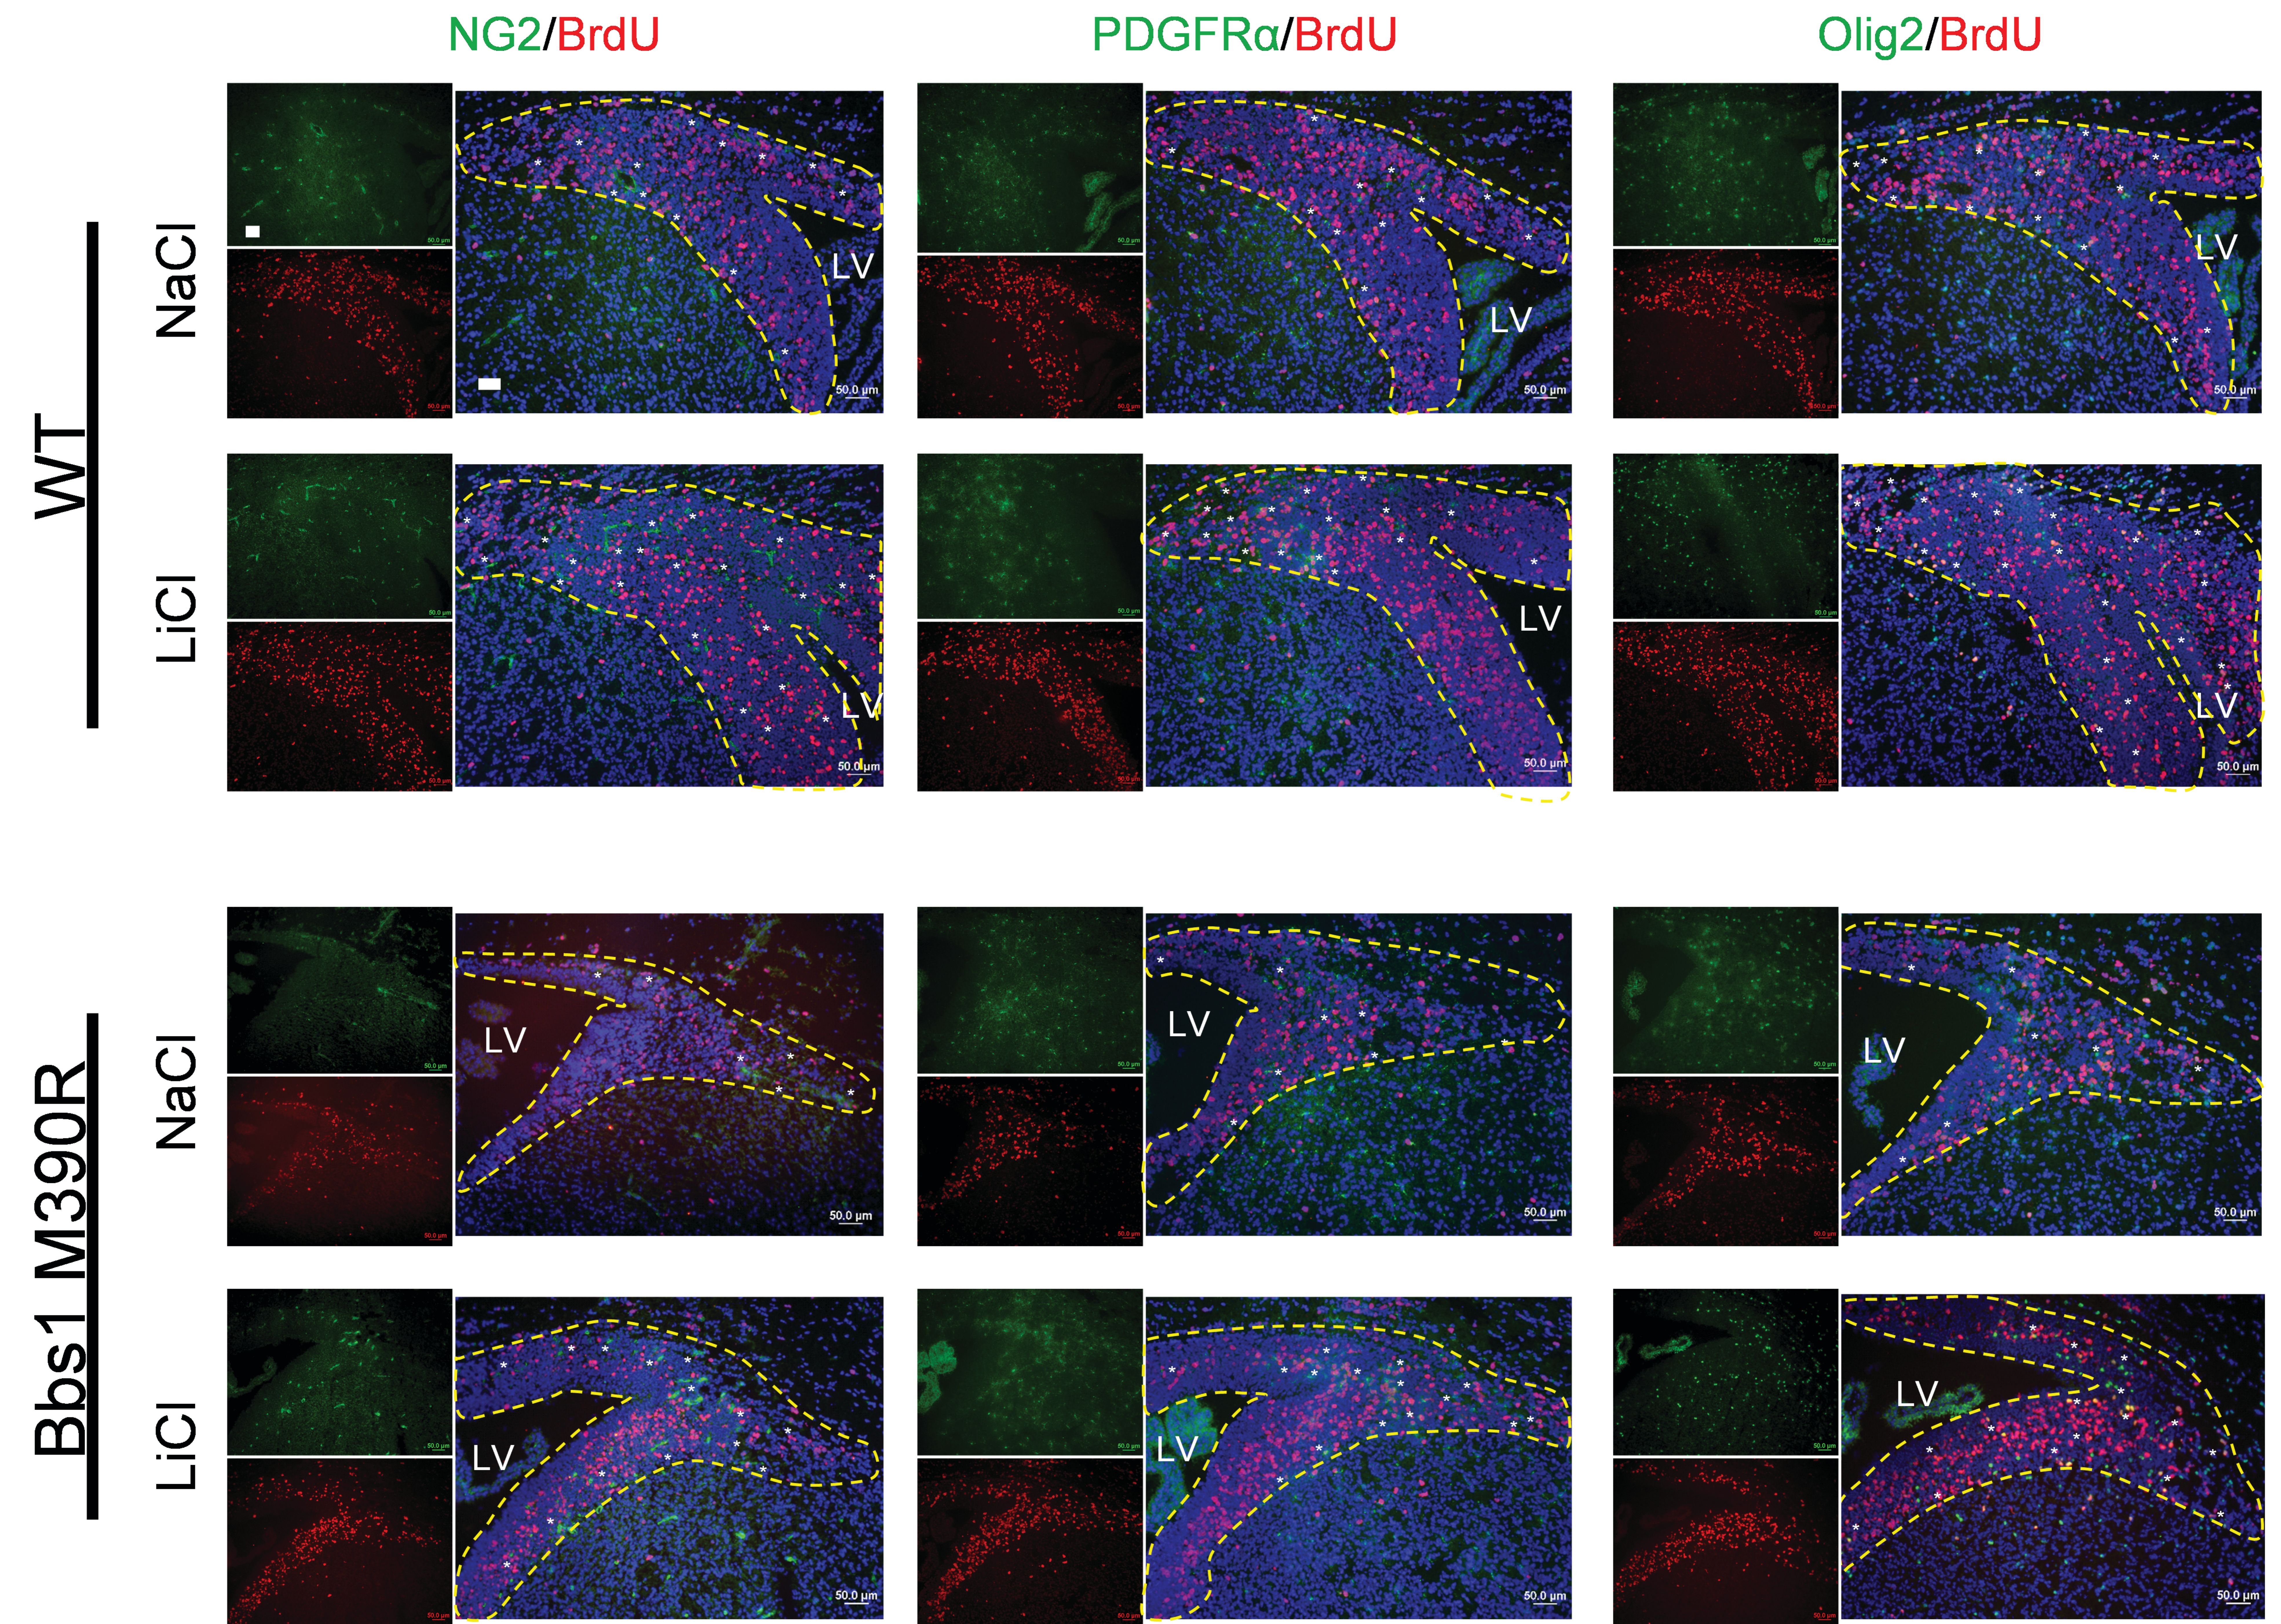

Supplementary Figure 7

**Supplementary Figure 7** Lithium treatment rescues NG2+PDGFR $\alpha$ + cell proliferation + in *Bbs1*<sup>M390R/M390R</sup> mice. Representative immunofluorescent images showing fewer BrdU labeled cells also expressing NG2 and PDGFR $\alpha$  in the SVZ of post-natal day 3 NaCl treated *Bbs1*<sup>M390R/M390R</sup> mice relative to WT mice. Lithium treatment increased the number of BrdU<sup>+</sup> cells expressing NG2 and PDGFR $\alpha$  in the SVZ of WT and *Bbs1*<sup>M390R/M390R</sup> mice relative to NaCl treated WT and *Bbs1*<sup>M390R/M390R</sup> mice (quantitations in **Fig. 6e, right**). Scale bars equal 50  $\mu$ m. LiCl, lithium chloride; SVZ, subventricular zone.





**Supplementary Figure 8** Lithium treatment does not modify apoptosis of neural progenitor cells. Representative immunofluorescent images showing more TUNEL labeled cells (green) also labeled with NG2 and PDGFR $\alpha$  (red) in the SVZ of post-natal day 3 NaCl and LiCl treated *Bbs1*<sup>M390R/M390R</sup> mice relative to NaCl and LiCl treated WT mice. Lithium treatment did not alter the number of TUNEL<sup>+</sup> cells also expressing NG2 and PDGFR $\alpha$  in *Bbs1*<sup>M390R/M390R</sup> relative to NaCl treated *Bbs1*<sup>M390R/M390R</sup> mice (quantitations in **Fig 6g, right**). Scale bars equal 50  $\mu$ m. LiCl, lithium chloride; SVZ, subventricular zone.
